# Supplementary material for: Simulation of Foot-and-Mouth Disease Spread and Effects of Mitigation Strategies to Support Veterinary Contingency Planning in Denmark
Source: MDPI journal article supplement (doi:10.3390/pathogens12030435), 2023-03-09
Supplement: s1 [file s1]

## Supplementary Material

**Figure S1:** Geographical map of Denmark. Gray dots show all livestock farms (i.e. cattle, small ruminant and pigs). Blue dots show all weather stations from which the data has been incorporated in the model. N.B. that the original location of the farms were scrambled within a 2.5 km radius circle. As Bornholm is more than 135 km away from rest of Denmark, the Island was not included in the model.

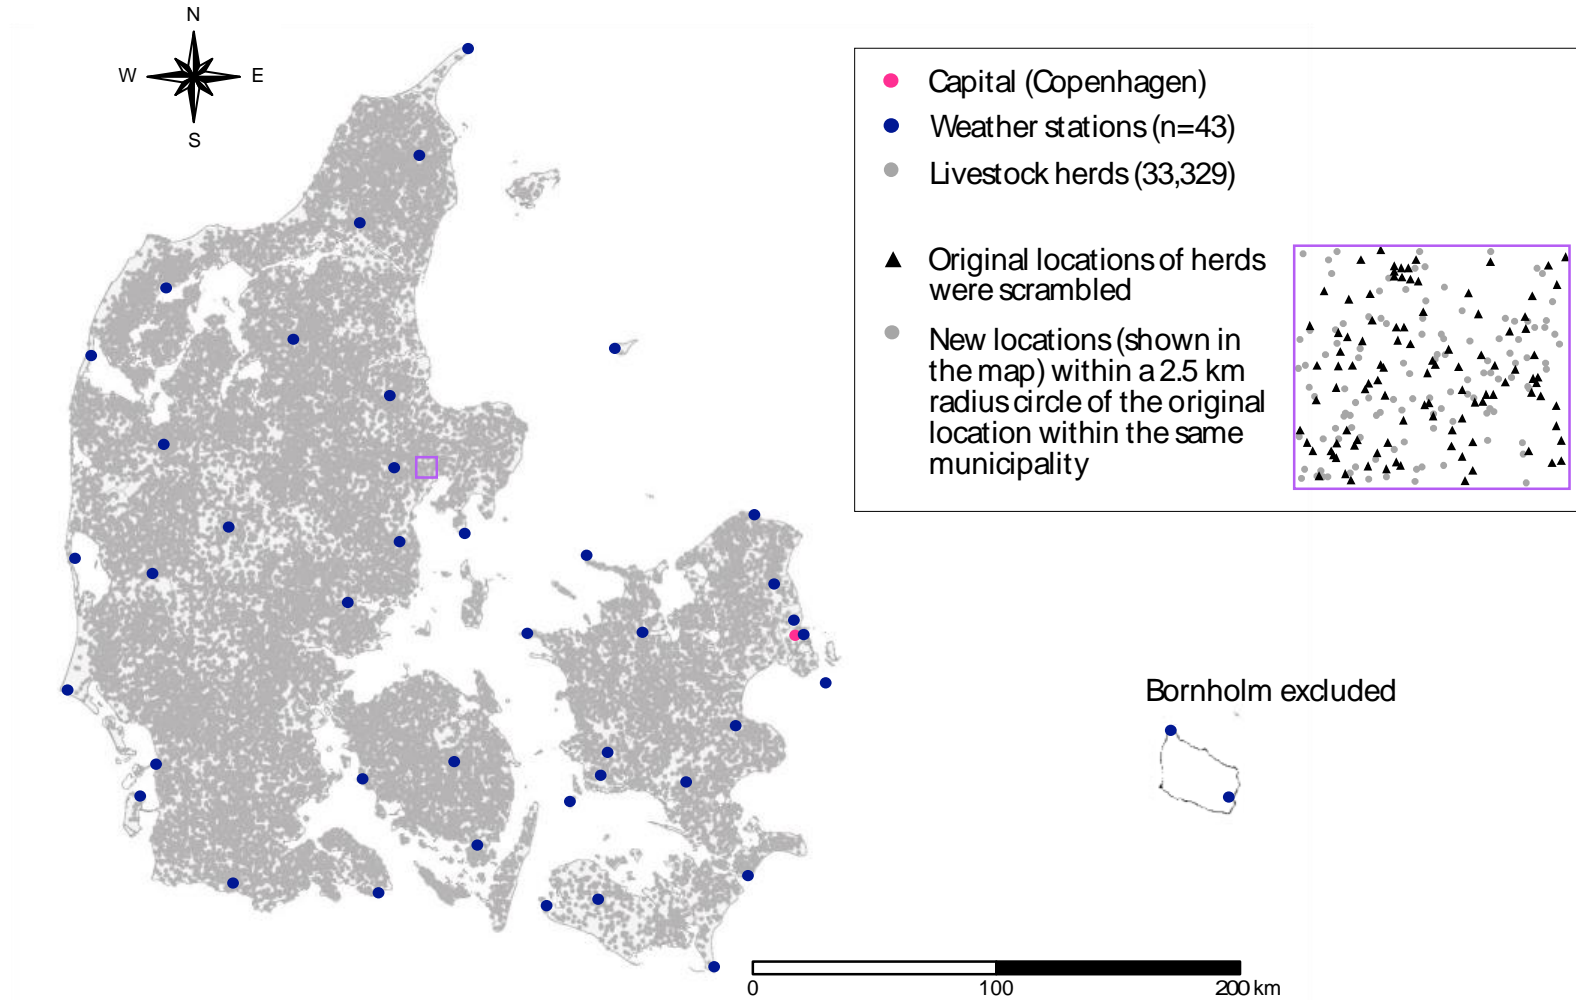

**Figure S2:** Contact probability between different livestock herd types based on movement data in 2020.

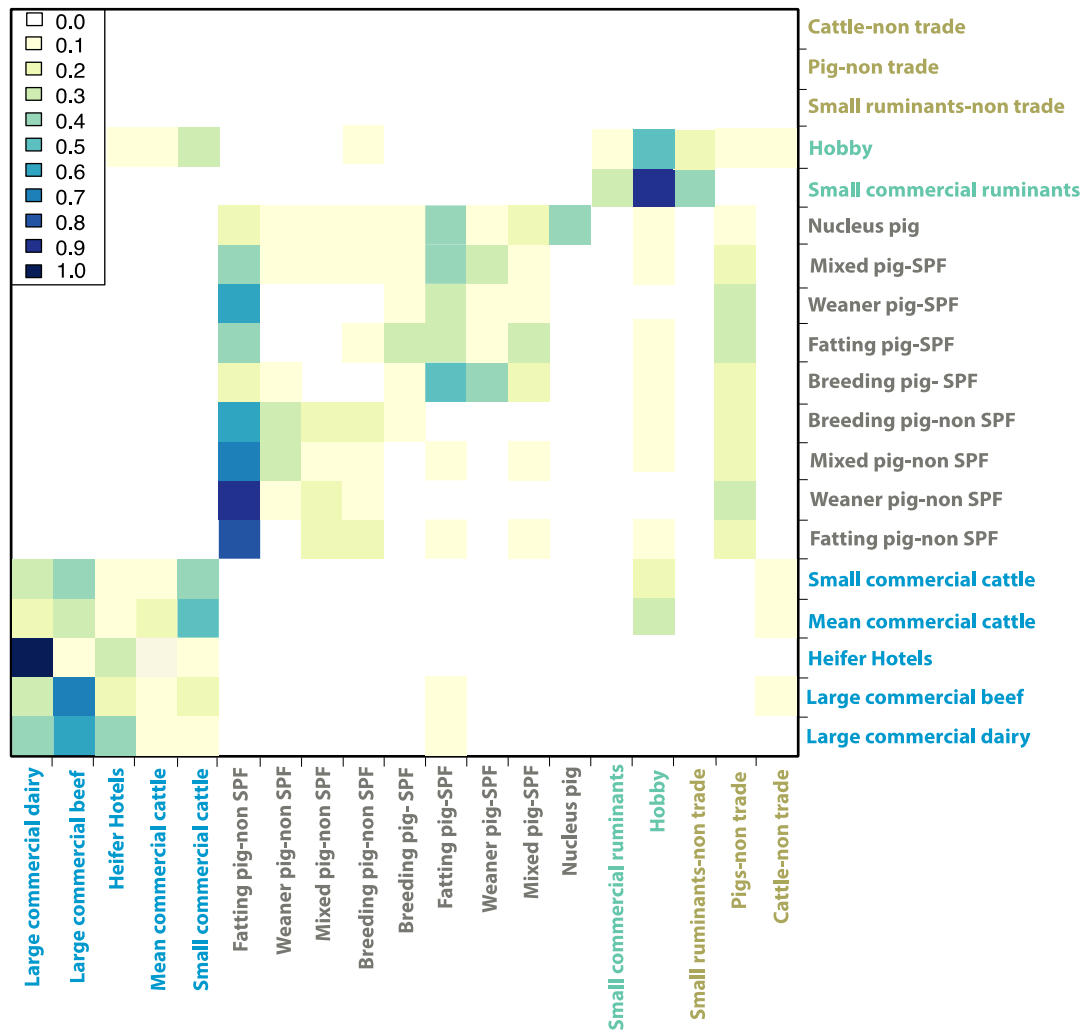

**Table S1:** Few parameterization numbers of the within-herd equation-based model.

| Herd Types                                      | Transmission rate ( $\beta$ ) <sup>1</sup> | Latent period (days) <sup>2</sup> | Infectious period (days) <sup>3</sup> | Incubation period (days) <sup>4</sup> | Clinical period (days) <sup>5</sup> | Probability of mortality <sup>6</sup> |
|-------------------------------------------------|--------------------------------------------|-----------------------------------|---------------------------------------|---------------------------------------|-------------------------------------|---------------------------------------|
| Large commercial dairy                          | 2.1                                        | 2                                 | 10                                    | 3                                     | 12                                  | 0.05                                  |
| Large commercial beef                           | 1.6                                        | 2                                 | 10                                    | 3                                     | 12                                  | 0.05                                  |
| Heifer Hotel                                    | 1.8                                        | 2                                 | 10                                    | 3                                     | 12                                  | 0.05                                  |
| Mean commercial cattle                          | 1.8                                        | 2                                 | 10                                    | 3                                     | 12                                  | 0.05                                  |
| Small commercial cattle                         | 1.8                                        | 2                                 | 10                                    | 3                                     | 12                                  | 0.05                                  |
| Small commercial ruminants                      | 0.5                                        | 5                                 | 10                                    | 6                                     | 10                                  | 0.03                                  |
| Large-scale commercial fattening pig, non-SPF   | 2.2                                        | 1                                 | 6                                     | 5                                     | 14                                  | 0.03                                  |
| Large-scale commercial weaner pig herd, non-SPF | 2.2                                        | 1                                 | 6                                     | 5                                     | 14                                  | 0.03                                  |
| Large-scale commercial mixed pig herd, non-SPF  | 2.2                                        | 1                                 | 6                                     | 5                                     | 14                                  | 0.03                                  |
| Large scale commercial breeding pig, non-SPF    | 2.2                                        | 1                                 | 6                                     | 5                                     | 14                                  | 0.15                                  |
| Large scale commercial breeding pig, SPF        | 2.2                                        | 1                                 | 6                                     | 5                                     | 14                                  | 0.15                                  |
| Hobby farms                                     | 1.5                                        | 4                                 | 5                                     | 4                                     | 12                                  | 0.03                                  |
| Large-scale commercial fattening pig herd, SPF  | 2.2                                        | 1                                 | 6                                     | 5                                     | 14                                  | 0.03                                  |
| Large-scale commercial weaner pig herd, SPF     | 2.2                                        | 1                                 | 6                                     | 5                                     | 14                                  | 0.03                                  |
| Large-scale commercial mixed pig herd, SPF      | 2.2                                        | 1                                 | 6                                     | 5                                     | 14                                  | 0.03                                  |
| Nucleus pig herd                                | 2.2                                        | 1                                 | 6                                     | 5                                     | 14                                  | 0.03                                  |
| Small ruminant without outgoings movements      | 0.5                                        | 5                                 | 10                                    | 6                                     | 10                                  | 0.03                                  |
| Cattle farms without outgoings movements        | 1.8                                        | 2                                 | 10                                    | 3                                     | 12                                  | 0.05                                  |
| Pig farms without outgoings movements           | 2.2                                        | 1                                 | 6                                     | 5                                     | 14                                  | 0.03                                  |

<sup>1</sup> Transmission rate = contact rate x transmission probability

<sup>2</sup> The period from initial infection to when an animal begins excreting FMD virus

<sup>3</sup> The period during which infected animals excrete virus and are thus capable of spreading the infection

<sup>4</sup> The period between exposure and onset of clinical symptoms

<sup>5</sup> Days of showing clinical signs. N.B. FMD not always be apparent clinically, especially in sheep

<sup>6</sup> Mortality rates are usually low, except in very young animals

**Table S2.** Post-outbreak surveillance sampling regime stratified by zone, number of sampled herds, and within-herd test procedure per species, based on EU Directive (based on the study by Garner et al., 2021; European Union, 2003).

| Protection zone                     | Sampling intensity (herds)      | Test procedure within herds                             |
|-------------------------------------|---------------------------------|---------------------------------------------------------|
| <b>Cattle</b>                       | Inspect all <sup>1</sup>        | Clinical inspection only                                |
| <b>Sheep</b>                        | Inspect all                     | Clinical + 95:5 animal sampling (serology) <sup>3</sup> |
| <b>Pigs</b>                         | Inspect all                     | Clinical inspection only                                |
| <b>Surveillance zone</b>            |                                 |                                                         |
| <b>Cattle</b>                       | 95:2 random sample <sup>2</sup> | Clinical inspection only                                |
| <b>Sheep</b>                        | 95:2 random sample              | Clinical + 95:5 sampling (serology)                     |
| <b>Pigs</b>                         | 95:2 random sample              | Clinical inspection only                                |
| <b>Vaccination zone<sup>4</sup></b> |                                 |                                                         |
| <b>Cattle</b>                       | Inspect all                     | Clinical + all animals (serology)                       |
| <b>Sheep</b>                        | Inspect all                     | Clinical + all animals (serology)                       |
| <b>Pigs</b>                         | Inspect all                     | Clinical + 95:5 animal sampling (serology) <sup>5</sup> |

<sup>1</sup> Clinical inspection of all susceptible animals in all herds. Post-outbreak surveillance in previously infected areas is assumed to begin 30 days after last infected holding is found.

<sup>2</sup> Randomly select sufficient herds to be 95% confident of detecting infection assuming a 2% herd prevalence (95:2). The exact number of holdings that need to be sampled depends on total number of eligible holdings.

<sup>3</sup> Within-herd sampling regime of 95:5 involves testing sufficient animals to achieve 95% confidence that an infected prevalence of at least 5% would be detected (Bradhurst et al., 2021).

<sup>4</sup> Note that surveillance of vaccinated population is only required under a vaccinate-and-retain policy and the test procedure shown is valid if all animals are vaccinated.

<sup>5</sup> Sampling all pigs is considered impractical. NB. we assume that any sample that tests positive within the post-outbreak surveillance would be subject to a confirmatory test as uncertainty about the presence of infection would be of concern for national disease managers, particularly the number of infected herds that are not detected (false negative) and the number of non-infected herds that are incorrectly tested as infected (false positive). Performance of laboratory tests is measured in terms of sensitivity and specificity. Any sample that tests positive in an initial (screening) test would be subject to a second confirmatory test. For unvaccinated populations this could involve two different structural protein serological tests or a structural and non-structural protein test. For vaccinated populations a combination of non-structural tests may be used, as vaccinated animals will test positive using structural protein serological tests (Garner et al., 2021).

**Table S3:** Epidemiological outcomes of the simulation model. Values shown as Median (5th and 95th percentiles)

| Mitigation measures stratified by epidemic initiation scenarios | Number of infected farms | Control duration (in days) | Depopulated farms | Vaccinated farms | Post-Outbreak (end day) | Clinical inspected herds | Number of tested herds (non-vaccinated)/(vaccinated) | Total animals culled |
|-----------------------------------------------------------------|--------------------------|----------------------------|-------------------|------------------|-------------------------|--------------------------|------------------------------------------------------|----------------------|
| <b>North_Cattle (SZ 1)</b>                                      |                          |                            |                   |                  |                         |                          |                                                      |                      |
| <b>Basic</b>                                                    | 2 (0-289)                | 35 (0-104)                 | 2 (0-288)         | 0 (0-0)          | 64 (1-216)              | 339 (1-10777)            | 1240 (1-32212)                                       | 108 (0-108779)       |
| <b>DP15</b>                                                     | 2 (0-257)                | 35 (0-114)                 | 2 (0-795)         | 0 (0-0)          | 64 (1-242)              | 357 (1-15822)            | 1245 (1-46265)                                       | 116 (0-409811)       |
| <b>DP15SZ15</b>                                                 | 2 (0-294)                | 35 (0-125)                 | 2 (0-918)         | 0 (0-0)          | 64 (1-209)              | 383 (1-11181)            | 1315 (1-33281)                                       | 250 (0-491166)       |
| <b>PZ5</b>                                                      | 3 (0-332)                | 36 (0-112)                 | 3 (0-328)         | 0 (0-0)          | 65 (1-270)              | 481 (1-16977)            | 1486 (1-49653)                                       | 392 (0-125265)       |
| <b>SZ15</b>                                                     | 2 (0-258)                | 36 (0-102)                 | 2 (0-257)         | 0 (0-0)          | 64 (1-206)              | 347 (1-10972)            | 1252 (1-32644)                                       | 243 (0-99352)        |
| <b>CH</b>                                                       | 3 (0-268)                | 36 (0-97)                  | 3 (0-350)         | 0 (0-0)          | 62 (1-209)              | 526 (1-11729)            | 1692 (1-34862)                                       | 410 (0-127879)       |
| <b>PV1km14d</b>                                                 | 2 (0-279)                | 35 (0-105)                 | 2 (0-279)         | 0 (0-2637)       | 64 (1-253)              | 355 (1-12459)            | 1259 (1-30349)/ 0 (0-98831)                          | 178 (0-103929)       |
| <b>PV1km25IH</b>                                                | 3 (0-301)                | 36 (0-109)                 | 3 (0-298)         | 0 (0-2641)       | 65 (1-238)              | 415 (1-11852)            | 1348 (1-31058)/ 0 (0-80636)                          | 275 (0-111091)       |
| <b>PV1km25PC</b>                                                | 2 (0-342)                | 36 (0-117)                 | 2 (0-342)         | 0 (0-0)          | 64 (1-229)              | 390 (1-11086)            | 1291 (1-33183)                                       | 250 (0-132409)       |
| <b>PV3km14d_bov</b>                                             | 2 (0-250)                | 36 (0-101)                 | 2 (0-250)         | 0 (0-4574)       | 65 (1-302)              | 399 (1-13240)            | 1210 (1-24006)/ 0 (0-179977)                         | 217 (0-99230)        |
| <b>PV3km14d_sui</b>                                             | 2 (0-293)                | 35 (0-106)                 | 2 (0-291)         | 0 (0-1038)       | 65 (1-232)              | 374 (1-11322)            | 1284 (1-31106)/0 (0-76985)                           | 235 (0-116046)       |
| <b>PV3km14d_ovi</b>                                             | 3 (0-263)                | 36 (0-101)                 | 3 (0-263)         | 0 (0-2558)       | 65 (1-247)              | 424 (1-12273)            | 1323 (0-31068)/0 (0-41959)                           | 273 (0-97935)        |

|                                  |           |            |            |            |             |                |                               |                                 |
|----------------------------------|-----------|------------|------------|------------|-------------|----------------|-------------------------------|---------------------------------|
| <b>SV3km14d</b>                  | 2 (0-288) | 36 (0-106) | 2 (0-286)  | 0 (0-3252) | 64 (1-1220) | 367 (1-8767)   | 1255 (1-25909)                | 169 (0-112494) / 0 (0-2007420)  |
| <b>SV3km25IH</b>                 | 2 (0-282) | 35 (0-110) | 2 (0-280)  | 0 (0-2903) | 64 (1-1224) | 366 (1-8201)   | 1231 (1-23691)                | 145 (0-106421) / 0 (0-2007231)  |
| <b>SV3km14d_bov</b>              | 2 (0-250) | 36 (0-98)  | 2 (0-250)  | 0 (0-1332) | 62 (1-344)  | 407 (1-9448)   | 1382 (1-24721)                | 219 (0-91013) / 0 (0-259929)    |
| <b>Central_Cattle<br/>(SZ 1)</b> |           |            |            |            |             |                |                               |                                 |
| <b>Basic</b>                     | 5 (0-335) | 39 (0-119) | 5 (0-333)  | 0 (0-0)    | 72 (1-231)  | 964 (1-11451)  | 2714 (1-34088)                | 1522 (0-125808)                 |
| <b>DP15</b>                      | 4 (0-328) | 39 (0-134) | 4 (0-1022) | 0 (0-0)    | 69 (1-216)  | 748 (1-11402)  | 2074 (1-34297)                | 1225 (0-539976)                 |
| <b>DP15SZ15</b>                  | 5 (0-345) | 40 (0-140) | 5 (0-1070) | 0 (0-0)    | 72 (1-220)  | 963 (1-11820)  | 2839 (1-35173)                | 1462 (0-555116)                 |
| <b>PZ5</b>                       | 5 (0-407) | 39 (0-124) | 5 (0-406)  | 0 (0-0)    | 72 (1-298)  | 857 (1-18303)  | 2315 (1-52396)                | 1414 (0-148119)                 |
| <b>SZ15</b>                      | 7 (0-357) | 41 (0-117) | 7 (0-354)  | 0 (0-0)    | 76 (1-230)  | 1138 (1-11757) | 3533 (1-34772)                | 1996 (0-139484)                 |
| <b>CH</b>                        | 4 (0-356) | 39 (0-116) | 5 (0-476)  | 0 (0-0)    | 69 (1-244)  | 1036 (1-12819) | 2657 (1-39105)                | 1597 (0-175800)                 |
| <b>PV1km14d</b>                  | 5 (0-390) | 40 (0-123) | 5 (0-389)  | 0 (0-2887) | 74 (1-273)  | 1061 (1-13056) | 3003 (1-32469) / 0 (0-101987) | 1701 (0-144701)                 |
| <b>PV1km25IH</b>                 | 5 (0-386) | 39 (0-123) | 5 (0-384)  | 0 (0-2796) | 72 (1-254)  | 900 (1-12423)  | 2612 (1-33580) / 0 (0-80690)  | 1991 (0-148202)                 |
| <b>PV1km25PC</b>                 | 4 (0-373) | 39 (0-123) | 4 (0-372)  | 0 (0-0)    | 70 (1-236)  | 762 (1-11586)  | 2168 (1-33984)                | 1187 (0-136713)                 |
| <b>PV3km14d_bov</b>              | 6 (0-356) | 40 (0-118) | 6 (0-355)  | 0 (0-5707) | 74 (1-354)  | 964 (1-14370)  | 1873 (1-24879) / 0 (0-222817) | 1459 (0-135196)                 |
| <b>PV3km14d_sui</b>              | 5 (0-402) | 39 (0-124) | 5 (0-399)  | 0 (0-1053) | 70 (1-259)  | 795 (1-12493)  | 2370 (1-34623) / 0 (0-79963)  | 1238 (0-149368)                 |
| <b>PV3km14d_ovi</b>              | 5 (0-402) | 39 (0-127) | 5 (0-400)  | 0 (0-3567) | 71 (1-301)  | 801 (1-13990)  | 2059 (1-33777) / 0 (0-57943)  | 1319 (0-156362)                 |
| <b>SV3km14d</b>                  | 6 (0-379) | 40 (0-128) | 6 (0-379)  | 0 (0-3439) | 74 (1-1246) | 950 (1-9394)   | 3042 (1-27269)                | 1687 (0-145767) / 0 (0-2009984) |

|                                |            |            |             |             |             |                |                                  |                                     |
|--------------------------------|------------|------------|-------------|-------------|-------------|----------------|----------------------------------|-------------------------------------|
| <b>SV3km25IH</b>               | 5 (0-423)  | 40 (0-130) | 5 (0-421)   | 0 (0-3286)  | 71 (1-1241) | 769 (1-9266)   | 2410 (1-27656)                   | 1663 (0-164735) / 0 (0-2009185)     |
| <b>SV3km14d_bov</b>            | 4 (0-357)  | 39 (0-117) | 4 (0-357)   | 0 (0-1918)  | 67 (1-457)  | 741 (1-9876)   | 2870 (1-25305)                   | 1312 (0-128121) / 0 (0-380189)      |
| <b>South_Cattle<br/>(SZ 1)</b> |            |            |             |             |             |                |                                  |                                     |
| <b>Basic</b>                   | 12 (0-528) | 45 (0-148) | 12 (0-526)  | 0 (0-0)     | 86 (1-277)  | 2134 (1-13085) | 6021 (1-39074)                   | 4450 (0-207986)                     |
| <b>DP15</b>                    | 12 (0-453) | 45 (0-169) | 12 (0-1414) | 0 (0-0)     | 88 (1-248)  | 2245 (1-12900) | 6476 (1-39154)                   | 4466 (0-712246)                     |
| <b>DP15SZ15</b>                | 12 (0-471) | 45 (0-173) | 12 (0-1463) | 0 (0-0)     | 86 (1-248)  | 2130 (1-12861) | 6238 (1-37916)                   | 4409 (0-708263)                     |
| <b>PZ5</b>                     | 15 (0-484) | 46 (0-138) | 14 (0-482)  | 0 (0-0)     | 95 (1-315)  | 2919 (1-19212) | 8177 (1-55634)                   | 5322 (0-192045)                     |
| <b>SZ15</b>                    | 14 (0-491) | 45 (0-139) | 14 (0-491)  | 0 (0-0)     | 90 (1-266)  | 2613 (1-12807) | 7315 (1-38284)                   | 5173 (0-188077)                     |
| <b>CH</b>                      | 13 (0-489) | 45 (0-139) | 17 (0-631)  | 0 (0-0)     | 93 (1-276)  | 3374 (1-14143) | 9377 (1-41490)                   | 5846 (0-235647)                     |
| <b>PV1km14d</b>                | 13 (0-546) | 45 (0-150) | 12 (0-544)  | 56 (0-3096) | 89 (1-311)  | 2216 (1-13580) | 6017 (1-34390) / 350 (0-104195)  | 4251 (0-203343)                     |
| <b>PV1km25IH</b>               | 14 (0-471) | 46 (0-138) | 14 (0-470)  | 0 (0-2841)  | 93 (1-279)  | 2428 (1-13049) | 7196 (1-35466) / 0 (0-85489)     | 5611 (0-177554)                     |
| <b>PV1km25PC</b>               | 14 (0-553) | 45 (0-154) | 14 (0-552)  | 0 (0-0)     | 93 (1-288)  | 2700 (1-13209) | 7451 (1-39135)                   | 5557 (0-212977)                     |
| <b>PV3km14d_bov</b>            | 13 (0-423) | 45 (0-131) | 13 (0-420)  | 72 (0-6197) | 92 (1-365)  | 2467 (1-14804) | 4191 (1-24455) / 2901 (0-228879) | 4779 (0-162685)                     |
| <b>PV3km14d_sui</b>            | 12 (0-436) | 44 (0-135) | 12 (0-436)  | 12 (0-1067) | 88 (1-276)  | 2137 (1-12699) | 6232 (1-35221) / 1 (0-81024)     | 3962 (0-164186)                     |
| <b>PV3km14d_ovi</b>            | 17 (0-474) | 46 (0-141) | 17 (0-470)  | 44 (0-3930) | 98 (1-328)  | 3258 (1-14864) | 7488 (1-35936) / 815 (0-63428)   | 5635 (0-178483)                     |
| <b>SV3km14d</b>                | 16 (0-501) | 46 (0-145) | 16 (0-499)  | 43 (0-3435) | 98 (1-1252) | 2954 (1-9834)  | 8307 (1-28149)                   | 5064 (0-189499) / 23736 (0-2010446) |
| <b>SV3km25IH</b>               | 14 (0-469) | 45 (0-139) | 14 (0-468)  | 0 (0-3498)  | 92 (1-1252) | 2554 (1-9615)  | 7606 (1-28117)                   | 4908 (0-168753) / 0 (0-2010802)     |

|                                  |            |            |            |             |            |                |                             |                                   |
|----------------------------------|------------|------------|------------|-------------|------------|----------------|-----------------------------|-----------------------------------|
| <b>SV3km14d_bov</b>              | 16 (0-451) | 46 (0-135) | 16 (0-450) | 16 (0-2414) | 91 (1-553) | 2878 (1-10399) | 5909 (1-25932)              | 5324 (0-165951) / 2885 (0-468393) |
| <b>Zealand_Cattle<br/>(SZ 1)</b> |            |            |            |             |            |                |                             |                                   |
| <b>Basic</b>                     | 1 (0-78)   | 30 (0-65)  | 1 (0-78)   | 0 (0-0)     | 58 (1-167) | 205 (1-9633)   | 455 (1-27825)               | 18 (0-28070)                      |
| <b>DP15</b>                      | 1 (0-67)   | 30 (0-67)  | 1 (0-190)  | 0 (0-0)     | 58 (1-160) | 203 (1-9418)   | 461 (1-25917)               | 17 (0-90106)                      |
| <b>DP15SZ15</b>                  | 1 (0-78)   | 30 (0-71)  | 1 (0-223)  | 0 (0-0)     | 58 (1-174) | 192 (1-10020)  | 415 (1-28331)               | 15 (0-93746)                      |
| <b>PZ5</b>                       | 1 (0-88)   | 30 (0-70)  | 1 (0-87)   | 0 (0-0)     | 58 (1-184) | 197 (1-11186)  | 417 (1-31744)               | 15 (0-30518)                      |
| <b>SZ15</b>                      | 1 (0-66)   | 30 (0-65)  | 1 (0-66)   | 0 (0-0)     | 58 (1-160) | 197 (1-9374)   | 431 (1-25835)               | 16 (0-23444)                      |
| <b>CH</b>                        | 1 (0-82)   | 30 (0-68)  | 1 (0-114)  | 0 (0-0)     | 56 (1-173) | 198 (1-10786)  | 441 (1-31836)               | 16 (0-35894)                      |
| <b>PV1km14d</b>                  | 1 (0-60)   | 30 (0-60)  | 1 (0-60)   | 0 (0-562)   | 58 (1-153) | 200 (1-8439)   | 428 (1-22756) / 0 (0-7680)  | 16 (0-20511)                      |
| <b>PV1km25IH</b>                 | 1 (0-70)   | 30 (0-67)  | 1 (0-69)   | 0 (0-1923)  | 58 (1-181) | 197 (1-9489)   | 446 (1-24578) / 0 (0-38880) | 15 (0-22989)                      |
| <b>PV1km25PC</b>                 | 1 (0-76)   | 30 (0-68)  | 1 (0-76)   | 0 (0-0)     | 58 (1-170) | 199 (1-9493)   | 422 (1-27101)               | 17 (0-26775)                      |
| <b>PV3km14d_bov</b>              | 1 (0-65)   | 30 (0-64)  | 1 (0-64)   | 0 (0-716)   | 58 (1-178) | 191 (1-8954)   | 416 (1-20378) / 0 (0-28778) | 15 (0-22428)                      |
| <b>PV3km14d_sui</b>              | 1 (0-72)   | 30 (0-65)  | 1 (0-71)   | 0 (0-196)   | 58 (1-160) | 200 (1-9006)   | 420 (1-25085) / 0 (0-6913)  | 17 (0-22716)                      |
| <b>PV3km14d_ovi</b>              | 1 (0-73)   | 30 (0-65)  | 1 (0-73)   | 0 (0-475)   | 58 (1-168) | 194 (1-9417)   | 419 (1-24849) / 0 (0-8169)  | 15 (0-24668)                      |
| <b>SV3km14d</b>                  | 1 (0-59)   | 30 (0-64)  | 1 (0-59)   | 0 (0-386)   | 58 (1-201) | 201 (1-7955)   | 437 (1-22716)               | 15 (0-21451) / 0 (0-203384)       |
| <b>SV3km25IH</b>                 | 1 (0-70)   | 30 (0-65)  | 1 (0-70)   | 0 (0-1205)  | 58 (1-429) | 196 (1-7372)   | 435 (1-21009)               | 16 (0-27141) / 0 (0-626903)       |
| <b>SV3km14d_bov</b>              | 1 (0-58)   | 30 (0-60)  | 1 (0-58)   | 0 (0-134)   | 56 (1-149) | 205 (1-8441)   | 464 (1-21140)               | 17 (0-20013) / 0 (0-25644)        |



| Entire_DK_Diary (SZ 2) |              |             |               |                 |                |                    |                                          |                                              |
|------------------------|--------------|-------------|---------------|-----------------|----------------|--------------------|------------------------------------------|----------------------------------------------|
| Basic                  | 136 (19-735) | 79 (46-179) | 135 (19-732)  | 0 (0-0)         | 180 (101-322)  | 9502 (3420-14680)  | 27955 (9047-44437)                       | 52197 (5882-277535)                          |
| DP15                   | 128 (19-693) | 81 (49-232) | 398 (31-2121) | 0 (0-0)         | 173 (95-300)   | 9386 (3689-15335)  | 27887 (10809-45090)                      | 194943 (11217-1053971)                       |
| DP15SZ15               | 133 (20-649) | 81 (50-220) | 412 (35-2017) | 0 (0-0)         | 174 (98-286)   | 9594 (3737-14771)  | 28373 (10943-43304)                      | 199090 (14259-1011028)                       |
| PZ5                    | 130 (20-670) | 77 (46-166) | 129 (20-666)  | 0 (0-0)         | 199 (101-365)  | 12305 (3655-20951) | 35443 (8700-61992)                       | 47715 (6233-251715)                          |
| SZ15                   | 136 (18-663) | 77 (47-163) | 136 (18-662)  | 0 (0-0)         | 179 (98-298)   | 9814 (3484-14195)  | 28906 (9628-42782)                       | 50049 (6425-248784)                          |
| CH                     | 134 (20-716) | 78 (46-172) | 189 (26-895)  | 0 (0-0)         | 178 (106-329)  | 10255 (4690-16125) | 30055 (12304-48879)                      | 67802 (9015-329897)                          |
| PV1km14d               | 134 (23-670) | 77 (48-166) | 134 (23-666)  | 1659 (123-3441) | 236 (108-365)  | 13425 (4192-20901) | 32529 (10377-56912) / 66817 (782-109562) | 50336 (7589-246317)                          |
| PV1km25IH              | 140 (21-712) | 79 (46-173) | 139 (21-708)  | 1280 (0-3274)   | 233 (105-365)  | 13216 (3876-21045) | 33151 (10341-59941) / 68294 (0-88415)    | 51832 (6532-258430)                          |
| PV1km25PC              | 136 (21-793) | 77 (47-190) | 135 (21-790)  | 0 (0-0)         | 179 (104-335)  | 9508 (3660-14356)  | 27671 (9116-43147)                       | 50304 (7527-294309)                          |
| PV3km14d               | 136 (20-641) | 77 (47-166) | 136 (20-639)  | 1073 (39-4878)  | 201 (101-365)  | 10181 (3449-15443) | 25289 (4703-31009) / 32022 (192-175922)  | 48729 (6229-248571)                          |
| PV3km14d_sui           | 138 (20-635) | 78 (47-167) | 138 (20-632)  | 708 (28-1101)   | 189 (104-321)  | 9963 (3576-14564)  | 27345 (10373-40489) / 40312 (420-83974)  | 53431 (6278-238393)                          |
| PV3km14d_ovi           | 131 (22-769) | 77 (46-189) | 131 (21-768)  | 552 (20-3243)   | 187 (102-365)  | 10016 (3825-15356) | 27747 (8476-40644) / 6392 (37-47417)     | 49162 (6364-290516)                          |
| SV3km14d               | 136 (23-653) | 79 (47-173) | 136 (23-651)  | 1384 (68-3623)  | 463 (107-1268) | 10845 (4179-17429) | 31145 (11185-51952)                      | 52090 (8142-249623) / 769536 (33085-2012313) |
| SV3km25IH              | 133 (20-664) | 78 (45-168) | 133 (20-660)  | 2149 (0-3614)   | 721 (101-1251) | 9801 (3685-18747)  | 28149 (8749-55640)                       | 49156 (6325-252339) / 1288102 (0-2011771)    |
| SV3km14d_bov           | 137 (21-706) | 77 (48-178) | 136 (21-703)  | 600 (26-3471)   | 209 (102-728)  | 9771 (3650-14170)  | 20954 (7421-28882)                       | 49514 (7051-265102) / 122328 (4510-664626)   |
| North_Pig (SZ 1)       |              |             |               |                 |                |                    |                                          |                                              |

|                           |            |            |             |              |              |                 |                                  |                                     |
|---------------------------|------------|------------|-------------|--------------|--------------|-----------------|----------------------------------|-------------------------------------|
| <b>Basic</b>              | 19 (0-356) | 49 (0-117) | 19 (0-350)  | 0 (0-0)      | 93 (1-226)   | 2632 (1-11266)  | 8359 (1-33018)                   | 8073 (0-147673)                     |
| <b>DP15</b>               | 22 (0-329) | 51 (0-131) | 41 (0-1013) | 0 (0-0)      | 97 (1-212)   | 2867 (1-10839)  | 9038 (1-32523)                   | 18296 (0-525966)                    |
| <b>DP15SZ15</b>           | 21 (0-312) | 51 (0-124) | 38 (0-919)  | 0 (0-0)      | 95 (1-207)   | 2820 (1- 10708) | 8866 (1-32041)                   | 19725 (0-494001)                    |
| <b>PZ5</b>                | 20 (0-335) | 49 (0-111) | 19 (0-330)  | 0 (0-0)      | 96 (1-256)   | 2730 (1-15157)  | 8431 (1-44987)                   | 8260 (0-129330)                     |
| <b>SZ15</b>               | 20 (0-359) | 49 (0-118) | 19 (0-355)  | 0 (0-0)      | 95 (1-220)   | 2793 (1-11241)  | 8690 (1-33130)                   | 8883 (0-153012)                     |
| <b>CH</b>                 | 20 (0-337) | 49 (0-114) | 26 (0-434)  | 0 (0-0)      | 100 (1-226)  | 3830 (1-11911)  | 11680 (1-35726)                  | 11285 (0-174532)                    |
| <b>PV1km14d</b>           | 20 (0-345) | 48 (0-118) | 20 (0-341)  | 109 (0-2865) | 95 (1-268)   | 2605 (1-12520)  | 8044 (1-30230) / 1408 (0-99354)  | 7799 (0-139025)                     |
| <b>PV1km25IH</b>          | 22 (0-353) | 50 (0-117) | 22 (0-349)  | 0 (0-2889)   | 100 (1-245)  | 2995 (1-11910)  | 9337 (1-30594) /0 (0-83052)      | 8912 (0-139469)                     |
| <b>PV1km25PC</b>          | 19 (0-377) | 49 (0-124) | 19 (0-375)  | 0 (0-0)      | 94 (1-232)   | 2677 (1-11123)  | 8217 (1-33206)                   | 8393 (0-160572)                     |
| <b>PV3km14d_bov</b>       | 22 (0-331) | 50 (0-112) | 21 (0-325)  | 141 (0-5095) | 101 (1-333)  | 2927 (1-13305)  | 7543 (1-22911) / 5606 (0-192821) | 8915 (0-135357)                     |
| <b>PV3km14d_sui</b>       | 20 (0-307) | 48 (0-108) | 19 (0-304)  | 30 (0-1037)  | 96 (1-230)   | 2875 (1-11037)  | 8950 (1-30675) / 786 (0-76718)   | 8543 (0-128404)                     |
| <b>PV3km14d_ovi</b>       | 20 (0-412) | 48 (0-127) | 19 (0-407)  | 49 (0-3304)  | 96 (1-295)   | 2709 (1-13245)  | 8277 (1-31677) / 842 (0-51409)   | 8305 (0-162518)                     |
| <b>SV3km14d</b>           | 20 (0-409) | 49 (0-134) | 19 (0-403)  | 59 (0-3268)  | 102 (1-1246) | 2662 (1-9056)   | 8463 (1-26979)                   | 7850 (0-157677) / 31442 (0-2008746) |
| <b>SV3km25IH</b>          | 21 (0-366) | 50 (0-125) | 21 (0-364)  | 0 (0-3158)   | 100 (1-1233) | 2771 (1-8475)   | 8553 (1-24159)                   | 9235 (0-145513) / 0 (0-2008844)     |
| <b>SV3km14d_bov</b>       | 21 (0-337) | 49 (0-116) | 20 (0-336)  | 24 (0-1632)  | 92 (1-407)   | 2644 (1-10785)  | 7817 (1-24015)                   | 8517 (0-132010) / 4737 (0-327618)   |
| <b>Central_Pig (SZ 1)</b> |            |            |             |              |              |                 |                                  |                                     |
| <b>Basic</b>              | 25 (0-430) | 51 (0-133) | 25 (0-427)  | 0 (0-0)      | 103 (1-245)  | 3530 (1-11445)  | 10439 (1-34413)                  | 10785 (0-173829)                    |

|                         |            |            |             |              |              |                |                                   |                                      |
|-------------------------|------------|------------|-------------|--------------|--------------|----------------|-----------------------------------|--------------------------------------|
| <b>DP15</b>             | 27 (0-384) | 53 (0-149) | 55 (0-1166) | 0 (0-0)      | 106 (1-230)  | 3888 (1-11518) | 11634 (1-33979)                   | 29883 (0-600881)                     |
| <b>DP15SZ15</b>         | 24 (0-375) | 52 (0-146) | 49 (0-1159) | 0 (0-0)      | 102 (1-221)  | 3604 (1-11501) | 10717 (1-34572)                   | 25119 (0-595399)                     |
| <b>PZ5</b>              | 25 (0-388) | 51 (0-120) | 24 (0-385)  | 0 (0-0)      | 104 (1-279)  | 3675 (1-17476) | 10878 (1-50136)                   | 11436 (0-160248)                     |
| <b>SZ15</b>             | 23 (0-379) | 50 (0-118) | 23 (0-375)  | 0 (0-0)      | 101 (1-231)  | 3261 (1-11376) | 9557 (1-33826)                    | 10248 (0-150099)                     |
| <b>CH</b>               | 23 (0-312) | 50 (0-111) | 32 (0-424)  | 0 (0-0)      | 110 (1-227)  | 4862 (1-11932) | 14487 (1-35718)                   | 14221 (0-167099)                     |
| <b>PV1km14d</b>         | 27 (0-467) | 51 (0-139) | 27 (0-463)  | 190 (0-2915) | 109 (1-287)  | 3781 (1-13077) | 10910 (1-33244) / 2488 (0-100911) | 11372 (0-186378)                     |
| <b>PV1km25IH</b>        | 28 (0-341) | 51 (0-118) | 27 (0-336)  | 209 (0-2882) | 108 (1-247)  | 3856 (1-11794) | 11235 (1-31547) / 2619 (0-82332)  | 11352 (0-137046)                     |
| <b>PV1km25PC</b>        | 24 (0-383) | 50 (0-121) | 23 (0-381)  | 0 (0-0)      | 101 (1-234)  | 3344 (1-11168) | 9910 (1-33261)                    | 10808 (0-151069)                     |
| <b>PV3km14d_bov</b>     | 23 (0-380) | 51 (0-121) | 23 (0-379)  | 162 (0-5666) | 105 (1-356)  | 3395 (1-14223) | 8227 (1-23150) / 6574 (0-214813)  | 10518 (0-152495)                     |
| <b>PV3km14d_sui</b>     | 25 (0-386) | 51 (0-127) | 24 (0-380)  | 48 (0-1050)  | 106 (1-253)  | 3681 (1-11708) | 10651 (1-31972) / 1271 (0-79178)  | 10635 (0-159152)                     |
| <b>PV3km14d_ovi</b>     | 23 (0-423) | 49 (0-131) | 22 (0-418)  | 69 (0-3507)  | 102 (1-300)  | 3317 (1-13916) | 9938 (1-33701) / 1274 (0-57431)   | 9943 (0-169126)                      |
| <b>SV3km14d</b>         | 24 (0-388) | 50 (0-129) | 23 (0-387)  | 71 (0-3200)  | 108 (1-1242) | 3210 (1-9096)  | 9527 (1-26529)                    | 10204 (0-154408) / 43328 (0-2009158) |
| <b>SV3km25IH</b>        | 25 (0-357) | 51 (0-125) | 24 (0-352)  | 0 (0-3126)   | 108 (1-1235) | 3384 (1-8440)  | 10076 (1-25021)                   | 10681 (0-152327) / 0 (0-2008526)     |
| <b>SV3km14d_bov</b>     | 22 (0-317) | 49 (0-112) | 22 (0-315)  | 27 (0-1668)  | 98 (1-419)   | 3113 (1-10914) | 8746 (1-24139)                    | 9652 (0-131827) / 5544 (0-339562)    |
| <b>South_Pig (SZ 1)</b> |            |            |             |              |              |                |                                   |                                      |
| <b>Basic</b>            | 25 (0-639) | 50 (0-166) | 25 (0-638)  | 0 (0-0)      | 103 (1-294)  | 3553 (1-12960) | 9807 (1-38722)                    | 9868 (0-249125)                      |
| <b>DP15</b>             | 27 (0-657) | 54 (0-215) | 60 (0-1953) | 0 (0-0)      | 103 (1-268)  | 3885 (1-14136) | 11053 (1-40634)                   | 28163 (0-976200)                     |

|                           |            |            |             |              |               |                |                                  |                                      |
|---------------------------|------------|------------|-------------|--------------|---------------|----------------|----------------------------------|--------------------------------------|
| <b>DP15SZ15</b>           | 27 (0-642) | 54 (0-213) | 58 (0-1888) | 0 (0-0)      | 105 (1-262)   | 4110 (1-13898) | 11614 (1-40918)                  | 27374 (0-959598)                     |
| <b>PZ5</b>                | 25 (0-647) | 52 (0-164) | 24 (0-645)  | 0 (0-0)      | 106 (1-358)   | 3613 (1-18992) | 9448 (1-55239)                   | 9932 (0-257784)                      |
| <b>SZ15</b>               | 24 (0-607) | 52 (0-159) | 24 (0-603)  | 0 (0-0)      | 103 (1-283)   | 3411 (1-12806) | 9305 (1-37308)                   | 10603 (0-241488)                     |
| <b>CH</b>                 | 23 (0-549) | 50 (0-145) | 31 (0-702)  | 0 (0-0)      | 107 (1-289)   | 4744 (1-13592) | 12555 (1-39558)                  | 12122 (0-270584)                     |
| <b>PV1km14d</b>           | 27 (0-652) | 52 (0-169) | 26 (0-649)  | 187 (0-3038) | 107 (1-328)   | 3506 (1-13448) | 9269 (1-34534) / 2689 (0-102848) | 10689 (0-254845)                     |
| <b>PV1km25IH</b>          | 25 (0-639) | 51 (0-170) | 25 (0-637)  | 48 (0-3088)  | 106 (1-12996) | 3572 (1-12996) | 9298 (1-34415) / 0 (0-89999)     | 9930 (0-247548)                      |
| <b>PV1km25PC</b>          | 24 (0-676) | 51 (0-174) | 23 (0-670)  | 0 (0-0)      | 101 (1-301)   | 3113 (1-12611) | 8459 (1-38062)                   | 9775 (0-269470)                      |
| <b>PV3km14d_bov</b>       | 27 (0-513) | 51 (0-146) | 26 (0-505)  | 200 (0-6467) | 110 (1-365)   | 3854 (1-14546) | 7211 (1-23416) / 8168 (0-225836) | 10873 (0-209534)                     |
| <b>PV3km14d_sui</b>       | 25 (0-600) | 51 (0-162) | 24 (0-593)  | 43 (0-1069)  | 104 (1-312)   | 3586 (1-13368) | 9404 (1-36986) / 1182 (0-82305)  | 10058 (0-243414)                     |
| <b>PV3km14d_ovi</b>       | 24 (0-679) | 51 (0-174) | 24 (0-676)  | 81 (0-4422)  | 105 (1-365)   | 3405 (1-14209) | 8122 (1-33771) / 1371 (0-63285)  | 9976 (0-270614)                      |
| <b>SV3km14d</b>           | 25 (0-579) | 52 (0-166) | 25 (0-576)  | 88 (0-3408)  | 111 (1-1263)  | 3560 (1-9558)  | 9441 (1-27667)                   | 10307 (0-243034) / 47649 (0-2010559) |
| <b>SV3km25IH</b>          | 29 (0-653) | 51 (0-168) | 28 (0-649)  | 115 (0-3411) | 117 (1-1258)  | 3823 (1-10117) | 10439 (1-29726)                  | 11160 (0-249313) / 52512 (0-2010686) |
| <b>SV3km14d_bov</b>       | 25 (0-573) | 51 (0-162) | 24 (0-571)  | 36 (0-2757)  | 100 (1-607)   | 3352 (1-12188) | 8048 (1-25130)                   | 9906 (0-230743) / 6886 (0-543897)    |
| <b>Zealand_Pig (SZ 1)</b> |            |            |             |              |               |                |                                  |                                      |
| <b>Basic</b>              | 2 (0-56)   | 32 (0-60)  | 1 (0-55)    | 0 (0-0)      | 59 (1-128)    | 230 (1-5775)   | 481 (1-15801)                    | 396 (0-28917)                        |
| <b>DP15</b>               | 2 (0-54)   | 34 (0-63)  | 2 (0-151)   | 0 (0-0)      | 61 (1-130)    | 230 (1-6238)   | 501 (1-16968)                    | 432 (0-78246)                        |
| <b>DP15SZ15</b>           | 2 (0-51)   | 34 (0-61)  | 2 (0-141)   | 0 (0-0)      | 60 (1-126)    | 233 (1-5801)   | 518 (1-15316)                    | 437 (0-70021)                        |

|                                 |            |             |              |            |              |                  |                             |                              |
|---------------------------------|------------|-------------|--------------|------------|--------------|------------------|-----------------------------|------------------------------|
| <b>PZ5</b>                      | 2 (0-54)   | 34 (0-60)   | 2 (0-52)     | 0 (0-0)    | 61 (1-127)   | 235 (1-5746)     | 488 (1-14828)               | 473 (0-25819)                |
| <b>SZ15</b>                     | 2 (0-56)   | 34 (0-60)   | 1 (0-54)     | 0 (0-0)    | 59 (1-130)   | 229 (1-5857)     | 483 (1-15519)               | 383 (0-30934)                |
| <b>CH</b>                       | 2 (0-51)   | 34 (0-59)   | 2 (0-71)     | 0 (0-0)    | 57 (1-138)   | 236 (1-7696)     | 516 (1-21502)               | 525 (0-32431)                |
| <b>PV1km14d</b>                 | 2 (0-56)   | 34 (0-62)   | 2 (0-55)     | 0 (0-551)  | 61 (1-135)   | 233 (1-6286)     | 499 (1-16054) / 0 (0-7632)  | 441 (0-28296)                |
| <b>PV1km25IH</b>                | 2 (0-48)   | 34 (0-59)   | 1 (0-47)     | 0 (0-1171) | 59 (1-130)   | 225 (1-5475)     | 468 (1-12704) / 0 (0-18534) | 438 (0-27942)                |
| <b>PV1km25PC</b>                | 2 (0-56)   | 34 (0-60)   | 1 (0-54)     | 0 (0-0)    | 59 (1-127)   | 229 (1-5707)     | 468 (1-15028)               | 390 (0-30617)                |
| <b>PV3km14d_bov</b>             | 2 (0-59)   | 34 (0-62)   | 1 (0-57)     | 0 (0-441)  | 59 (1-137)   | 230 (1-5856)     | 488 (1-13320) / 0 (0-16675) | 413 (0-29281)                |
| <b>PV3km14d_sui</b>             | 2 (0-54)   | 34 (0-60)   | 2 (0-53)     | 0 (0-120)  | 60 (1-127)   | 234 (1-5611)     | 499 (1-14820) / 0 (0-4350)  | 473 (0-28638)                |
| <b>PV3km14d_ovl</b>             | 2 (0-59)   | 32 (0-61)   | 1 (0-57)     | 0 (0-302)  | 59 (1-135)   | 224 (1-6403)     | 482 (1-16243) / 0 (0-4352)  | 329 (0-26726)                |
| <b>SV3km14d</b>                 | 1 (0-54)   | 31 (0-61)   | 1 (0-54)     | 0 (0-243)  | 59 (1-144)   | 227 (1-5558)     | 467 (1-15722)               | 362 (0-25931) / 0 (0-111740) |
| <b>SV3km25IH</b>                | 1 (0-49)   | 31 (0-60)   | 1 (0-49)     | 0 (0-638)  | 59 (1-269)   | 229 (1-4816)     | 486 (1-13311)               | 389 (0-28435) / 0 (0-352349) |
| <b>SV3km14d_bov</b>             | 2 (0-54)   | 32 (0-60)   | 1 (0-53)     | 0 (0-93)   | 56 (1-125)   | 227 (1-5718)     | 473 (1-14749)               | 438 (0-27084) / 0 (0-16755)  |
| <b>Entire_DK_Weather (SZ 2)</b> |            |             |              |            |              |                  |                             |                              |
| <b>Basic</b>                    | 61 (2-616) | 63 (35-161) | 59 (2-605)   | 0 (0-0)    | 143 (62-292) | 6909 (290-12832) | 20432 (550-38215)           | 24572 (1556-229912)          |
| <b>DP15</b>                     | 59 (2-524) | 64 (35-184) | 163 (2-1598) | 0 (0-0)    | 138 (59-262) | 6911 (255-12931) | 20351 (550-38945)           | 87696 (1306-829743)          |
| <b>DP15SZ15</b>                 | 60 (2-491) | 64 (34-177) | 164 (2-1507) | 0 (0-0)    | 139 (59-254) | 6823 (205-12786) | 20058 (521-37916)           | 84029 (1167-783622)          |
| <b>PZ5</b>                      | 64 (2-644) | 63 (35-164) | 61 (2-638)   | 0 (0-0)    | 151 (62-360) | 7806 (281-19692) | 22873 (598-58796)           | 26083 (1458-247955)          |

|                              |            |             |            |              |               |                  |                                      |                                          |
|------------------------------|------------|-------------|------------|--------------|---------------|------------------|--------------------------------------|------------------------------------------|
| <b>SZ15</b>                  | 64 (2-655) | 63 (35-165) | 62 (2-650) | 0 (0-0)      | 145 (62-298)  | 6969 (271-13125) | 20711 (525-39520)                    | 26209 (1426-249037)                      |
| <b>CH</b>                    | 63 (2-542) | 64 (35-148) | 85 (2-684) | 0 (0-0)      | 152 (59-285)  | 8304 (272-14464) | 24375 (585-44671)                    | 33896 (1343-260430)                      |
| <b>PV1km14d</b>              | 58 (2-614) | 62 (35-161) | 57 (2-608) | 630 (0-3116) | 151 (62-365)  | 7541 (272-19483) | 20914 (535-52343) / 13803 (0-103230) | 24618 (1213-242252)                      |
| <b>PV1km25IH</b>             | 69 (2-582) | 64 (36-154) | 67 (2-573) | 865 (0-3032) | 175 (63-356)  | 8514 (274-19192) | 21535 (550-54663) / 43156 (0-86934)  | 27522 (1556-222614)                      |
| <b>PV1km25PC</b>             | 70 (2-724) | 65 (35-181) | 68 (2-721) | 0 (0-0)      | 147 (62-321)  | 7224 (193-13914) | 21145 (512-42456)                    | 29718 (1556-273456)                      |
| <b>PV3km14d_bov</b>          | 67 (3-597) | 63 (36-158) | 66 (2-594) | 317 (0-4523) | 152 (64-365)  | 6896 (307-14180) | 18670 (514-28836) / 6745 (0-1683559) | 26805 (1557-235960)                      |
| <b>PV3km14d_sui</b>          | 63 (3-615) | 64 (36-164) | 60 (2-609) | 178 (0-1070) | 145 (62-311)  | 7031 (306-13434) | 19773 (620-37822) / 8321 (0-82604)   | 25880 (1552-238906)                      |
| <b>PV3km14d_ovl</b>          | 56 (2-629) | 61 (35-164) | 54 (2-625) | 133 (0-2795) | 141 (62-338)  | 6574 (271-14083) | 18661 (514-37116) / 1052 (0-41960)   | 23391 (1295-241843)                      |
| <b>SV3km14d</b>              | 61 (2-606) | 64 (36-169) | 59 (2-605) | 323 (0-3464) | 189 (62-1256) | 7102 (276-16390) | 20772 (587-46838)                    | 26545 (1453-240083) / 191320 (0-2010723) |
| <b>SV3km25IH</b>             | 57 (2-606) | 63 (36-159) | 57 (2-599) | 853 (0-3449) | 359 (63-1245) | 6265 (298-16941) | 18376 (636-48229)                    | 24926 (1556-229674) / 502259 (0-2010822) |
| <b>SV3km14d_bov</b>          | 56 (2-460) | 61 (35-142) | 54 (2-457) | 121 (0-2328) | 135 (60-536)  | 5156 (282-8598)  | 15291 (614-24887)                    | 22486 (1464-177328) / 24285 (0-454574)   |
| <b>North_Ruminant (SZ 1)</b> |            |             |            |              |               |                  |                                      |                                          |
| <b>Basic</b>                 | 1 (0-14)   | 30 (0-45)   | 1 (0-14)   | 0 (0-0)      | 58 (1-88)     | 251 (1-2479)     | 846 (1-7879)                         | 8 (0-6477)                               |
| <b>DP15</b>                  | 1 (0-14)   | 30 (0-49)   | 1 (0-14)   | 0 (0-0)      | 58 (1-89)     | 251 (1-2152)     | 846 (1-6963)                         | 7 (0-6843)                               |
| <b>DP15SZ15</b>              | 1 (0-15)   | 30 (0-48)   | 1 (0-20)   | 0 (0-0)      | 58 (1-94)     | 254 (1-2700)     | 863 (1-8648)                         | 8 (0-8633)                               |
| <b>PZ5</b>                   | 1 (0-18)   | 30 (0-48)   | 1 (0-18)   | 0 (0-0)      | 58 (1-99)     | 254 (1-3462)     | 844 (1-11175)                        | 8 (0-5928)                               |
| <b>SZ15</b>                  | 1 (0-15)   | 30 (0-45)   | 1 (0-15)   | 0 (0-0)      | 58 (1-92)     | 253 (1-2686)     | 863 (1-8694)                         | 8 (0-6438)                               |

|                                |          |           |          |           |            |              |                           |                          |
|--------------------------------|----------|-----------|----------|-----------|------------|--------------|---------------------------|--------------------------|
| <b>CH</b>                      | 1 (0-16) | 30 (0-47) | 1 (0-22) | 0 (0-0)   | 56 (1-101) | 256 (1-3996) | 864 (1-13589)             | 8 (0-9617)               |
| <b>PV1km14d</b>                | 1 (0-16) | 30 (0-45) | 1 (0-16) | 0 (0-68)  | 58 (1-93)  | 251 (1-2862) | 844 (1-8641) / 0 (0-793)  | 7 (0-6482)               |
| <b>PV1km25IH</b>               | 1 (0-14) | 30 (0-46) | 1 (0-14) | 0 (0-0)   | 58 (1-92)  | 254 (1-2713) | 857 (1-8548)              | 8 (0-5627)               |
| <b>PV1km25PC</b>               | 1 (0-15) | 30 (0-45) | 1 (0-14) | 0 (0-0)   | 58 (1-89)  | 252 (1-2525) | 858 (1-7860)              | 8 (0-5291)               |
| <b>PV3km14d_bov</b>            | 1 (0-20) | 30 (0-47) | 1 (0-20) | 0 (0-110) | 58 (1-103) | 253 (1-3224) | 842 (1-8961) / 0 (0-4484) | 8 (0-7317)               |
| <b>PV3km14d_sui</b>            | 1 (0-17) | 30 (0-47) | 1 (0-17) | 0 (0-21)  | 58 (1-93)  | 253 (1-2584) | 861 (1-8793) / 0 (0-229)  | 8 (0-5981)               |
| <b>PV3km14d_ovi</b>            | 1 (0-13) | 30 (0-44) | 1 (0-13) | 0 (0-30)  | 58 (1-87)  | 252 (1-2022) | 852 (1-6865) / 0 (0-430)  | 7 (0-4800)               |
| <b>SV3km14d</b>                | 1 (0-11) | 30 (0-44) | 1 (0-11) | 0 (0-29)  | 58 (1-89)  | 252 (1-1856) | 847 (1-5861)              | 8 (0-4182) / 0 (0-21287) |
| <b>SV3km25IH</b>               | 1 (0-15) | 30 (0-46) | 1 (0-15) | 0 (0-0)   | 58 (1-94)  | 253 (1-2559) | 855 (1-8717)              | 8 (0-5819) / 0 (0-0)     |
| <b>SV3km14d_bov</b>            | 1 (0-14) | 30 (0-47) | 1 (0-14) | 0 (0-16)  | 56 (1-89)  | 253 (1-2943) | 853 (1-8772)              | 8 (0-6565) / 0 (0-3043)  |
| <b>Central_Ruminant (SZ 1)</b> |          |           |          |           |            |              |                           |                          |
| <b>Basic</b>                   | 1 (0-17) | 30 (0-47) | 1 (0-17) | 0 (0-0)   | 58 (1-99)  | 231 (1-3207) | 665 (1-10243)             | 8 (0-7086)               |
| <b>DP15</b>                    | 1 (0-19) | 30 (0-49) | 1 (0-30) | 0 (0-0)   | 58 (1-99)  | 230 (1-3281) | 662 (1-9685)              | 8 (0-12619)              |
| <b>DP15SZ15</b>                | 1 (0-19) | 30 (0-52) | 1 (0-31) | 0 (0-0)   | 58 (1-101) | 230 (1-3771) | 670 (1-10858)             | 7 (0-11024)              |
| <b>PZ5</b>                     | 1 (0-21) | 30 (0-48) | 1 (0-21) | 0 (0-0)   | 58 (1-103) | 230 (1-3828) | 657 (1-11022)             | 8 (0-7089)               |
| <b>SZ15</b>                    | 1 (0-23) | 30 (0-51) | 1 (0-23) | 0 (0-0)   | 58 (1-107) | 232 (1-3931) | 676 (1-12248)             | 8 (0-5362)               |
| <b>CH</b>                      | 1 (0-17) | 30 (0-48) | 1 (0-26) | 0 (0-0)   | 56 (1-107) | 232 (1-4613) | 665 (1-14051)             | 7 (0-10139)              |

|                              |          |           |          |           |            |              |                            |                          |
|------------------------------|----------|-----------|----------|-----------|------------|--------------|----------------------------|--------------------------|
| <b>PV1km14d</b>              | 1 (0-14) | 30 (0-47) | 1 (0-14) | 0 (0-99)  | 58 (1-95)  | 230 (1-2898) | 659 (1-8753) / 0 (0-952)   | 7 (0-6062)               |
| <b>PV1km25IH</b>             | 1 (0-18) | 30 (0-47) | 1 (0-18) | 0 (0-0)   | 58 (1-98)  | 230 (1-2935) | 660 (1-9188)               | 7 (0-6736)               |
| <b>PV1km25PC</b>             | 1 (0-17) | 30 (0-47) | 1 (0-17) | 0 (0-0)   | 58 (1-96)  | 230 (1-2985) | 660 (1-9095)               | 7 (0-6663)               |
| <b>PV3km14d_bov</b>          | 1 (0-13) | 30 (0-45) | 1 (0-13) | 0 (0-72)  | 58 (1-91)  | 230 (1-2322) | 670 (1-6248) / 0 (0-3164)  | 7 (0-5512)               |
| <b>PV3km14d_sui</b>          | 1 (0-18) | 30 (0-47) | 1 (0-17) | 0 (0-26)  | 58 (1-96)  | 230 (1-3144) | 676 (1-9670) / 0 (0-535)   | 8 (0-7539)               |
| <b>PV3km14d_ovi</b>          | 1 (0-22) | 30 (0-49) | 1 (0-21) | 0 (0-65)  | 58 (1-103) | 231 (1-3678) | 674 (1-11210) / 0 (0-1075) | 8 (0-8411)               |
| <b>SV3km14d</b>              | 1 (0-17) | 30 (0-46) | 1 (0-17) | 0 (0-52)  | 58 (1-97)  | 231 (1-3233) | 670 (1-9903)               | 8 (0-6725) / 0 (0-29745) |
| <b>SV3km25IH</b>             | 1 (0-14) | 30 (0-45) | 1 (0-14) | 0 (0-0)   | 58 (1-91)  | 229 (1-2658) | 655 (1-8350)               | 7 (0-5362) / 0 (0-0)     |
| <b>SV3km14d_bov</b>          | 1 (0-14) | 30 (0-46) | 1 (1-13) | 0 (0-18)  | 56 (1-86)  | 230 (1-3491) | 664 (1-10142)              | 7 (0-7209) / 0 (0-4664)  |
| <b>South_Ruminant (SZ 1)</b> |          |           |          |           |            |              |                            |                          |
| <b>Basic</b>                 | 1 (0-17) | 30 (0-49) | 1 (0-17) | 0 (0-0)   | 58 (1-99)  | 277 (1-3134) | 766 (1-8872)               | 11 (0-8606)              |
| <b>DP15</b>                  | 1 (0-23) | 30 (0-52) | 1 (0-44) | 0 (0-0)   | 58 (1-105) | 281 (1-3950) | 789 (1-11974)              | 11 (0-16718)             |
| <b>DP15SZ15</b>              | 1 (0-22) | 30 (0-53) | 1 (0-43) | 0 (0-0)   | 58 (1-104) | 280 (1-3854) | 786 (1-11350)              | 11 (0-17214)             |
| <b>PZ5</b>                   | 1 (0-20) | 30 (0-49) | 1 (0-20) | 0 (0-0)   | 58 (1-101) | 283 (1-3776) | 771 (1-10968)              | 10 (0-8689)              |
| <b>SZ15</b>                  | 1 (0-32) | 30 (0-53) | 1 (0-32) | 0 (0-0)   | 58 (1-118) | 280 (1-4987) | 780 (1-14151)              | 12 (0-12918)             |
| <b>CH</b>                    | 1 (0-22) | 30 (0-51) | 1 (0-32) | 0 (0-0)   | 56 (1-117) | 283 (1-5320) | 794 (1-15761)              | 12 (0-12867)             |
| <b>PV1km14d</b>              | 1 (0-22) | 30 (0-49) | 1 (0-22) | 0 (0-182) | 58 (1-107) | 280 (1-4002) | 776 (1-11671) / 0 (0-2135) | 12 (0-10143)             |



|                                |          |           |          |           |            |              |                            |                            |
|--------------------------------|----------|-----------|----------|-----------|------------|--------------|----------------------------|----------------------------|
| <b>PV1km25IH</b>               | 1 (0-29) | 30 (0-55) | 1 (0-28) | 0 (0-269) | 58 (1-117) | 279 (1-4626) | 784 (1-13699) / 0 (0-3086) | 13 (0-9953)                |
| <b>PV1km25PC</b>               | 1 (0-26) | 30 (0-52) | 1 (0-26) | 0 (0-0)   | 58 (1-112) | 281 (1-4409) | 787 (1-11805)              | 12 (0-10818)               |
| <b>PV3km14d_bov</b>            | 1 (0-25) | 30 (0-50) | 1 (0-24) | 0 (0-190) | 58 (1-112) | 278 (1-4105) | 769 (1-10573) / 0 (0-7745) | 11 (0-9611)                |
| <b>PV3km14d_sui</b>            | 1 (0-26) | 30 (0-51) | 1 (0-25) | 0 (0-39)  | 58 (1-109) | 279 (1-4132) | 777 (1-11848) / 0 (0-942)  | 10 (0-8942)                |
| <b>PV3km14d_ovi</b>            | 1 (0-28) | 30 (0-50) | 1 (0-28) | 1 (0-27)  | 58 (1-112) | 279 (1-4476) | 789 (1-12467) / 0 (0-1969) | 11 (0-11142)               |
| <b>SV3km14d</b>                | 1 (0-27) | 30 (0-51) | 1 (0-27) | 0 (0-111) | 58 (1-118) | 278 (1-4611) | 773 (1-13251)              | 11 (0-10734) / 0 (0-58425) |
| <b>SV3km25IH</b>               | 1 (0-25) | 30 (0-50) | 1 (0-24) | 0 (0-0)   | 58 (1-106) | 280 (1-3970) | 781 (1-11115)              | 11 (0-9742) / 0 (0-0)      |
| <b>SV3km14d_bov</b>            | 1 (0-25) | 30 (0-50) | 1 (0-25) | 0 (0-38)  | 56 (1-104) | 280 (1-3896) | 776 (1-10493)              | 13 (0-9570) / 0 (0-8125)   |
| <b>Zealand_Ruminant (SZ 1)</b> |          |           |          |           |            |              |                            |                            |
| <b>Basic</b>                   | 1 (0-2)  | 30 (0-36) | 1 (0-2)  | 0 (0-0)   | 58 (1-64)  | 199 (1-325)  | 413 (1-842)                | 6 (0-353)                  |
| <b>DP15</b>                    | 1 (0-2)  | 30 (0-36) | 1 (0-2)  | 0 (0-0)   | 58 (1-64)  | 199 (1-340)  | 412 (1-818)                | 6 (0-216)                  |
| <b>DP15SZ15</b>                | 1 (0-2)  | 30 (0-36) | 1 (0-2)  | 0 (0-0)   | 58 (1-64)  | 202 (1-396)  | 417 (1-871)                | 6 (0-418)                  |
| <b>PZ5</b>                     | 1 (0-2)  | 30 (0-36) | 1 (0-2)  | 0 (0-0)   | 58 (1-63)  | 201 (1-377)  | 413 (1-850)                | 6 (0-268)                  |
| <b>SZ15</b>                    | 1 (0-2)  | 30 (0-36) | 1 (0-2)  | 0 (0-0)   | 58 (1-63)  | 199 (1-324)  | 417 (1-813)                | 6 (0-420)                  |
| <b>CH</b>                      | 1 (0-2)  | 30 (0-34) | 1 (0-2)  | 0 (0-0)   | 56 (1-60)  | 199 (1-363)  | 423 (1-843)                | 6 (0-257)                  |
| <b>PV1km14d</b>                | 1 (0-2)  | 30 (0-36) | 1 (0-2)  | 0 (0-0)   | 58 (1-64)  | 199 (1-353)  | 416 (1-872)                | 6 (0-328)                  |
| <b>PV1km25IH</b>               | 1 (0-2)  | 30 (0-36) | 1 (0-2)  | 0 (0-0)   | 58 (1-64)  | 198 (1-354)  | 413 (1-835)                | 6 (0-255)                  |
| <b>PV1km25PC</b>               | 1 (0-2)  | 30 (0-36) | 1 (0-2)  | 0 (0-0)   | 58 (1-64)  | 198 (1-341)  | 414 (1-850)                | 6 (0-773)                  |

|                                  |          |            |          |          |            |                |                |                     |
|----------------------------------|----------|------------|----------|----------|------------|----------------|----------------|---------------------|
| <b>PV3km14d_bov</b>              | 1 (0-2)  | 30 (0-36)  | 1 (0-2)  | 0 (0-0)  | 58 (1-64)  | 199 (1-325)    | 414 (1-830)    | 6 (0-322)           |
| <b>PV3km14d_sui</b>              | 1 (0-2)  | 30 (0-36)  | 1 (0-2)  | 0 (0-0)  | 58 (1-64)  | 199 (1-329)    | 413 (1-850)    | 6 (0-440)           |
| <b>PV3km14d_ovi</b>              | 1 (0-2)  | 30 (0-36)  | 1 (0-2)  | 0 (0-0)  | 58 (1-65)  | 200 (1-343)    | 414 (1-875)    | 6 (0-441)           |
| <b>SV3km14d</b>                  | 1 (0-3)  | 30 (0-36)  | 1 (0-3)  | 0 (0-0)  | 58 (1-64)  | 200 (1-388)    | 418 (1-843)    | 7 (0-509) / 0 (0-0) |
| <b>SV3km25IH</b>                 | 1 (0-2)  | 30 (0-36)  | 1 (0-2)  | 0 (0-0)  | 58 (1-64)  | 200 (1-353)    | 413 (1-840)    | 6 (0-365) / 0 (0-0) |
| <b>SV3km14d_bov</b>              | 1 (0-2)  | 30 (0-35)  | 1 (0-2)  | 0 (0-0)  | 56 (1-61)  | 199 (1-322)    | 410 (1-808)    | 6 (0-428) / 0 (0-0) |
| <b>Entire_DK_Ruminant (SZ 2)</b> |          |            |          |          |            |                |                |                     |
| <b>Basic</b>                     | 1 (1-7)  | 30 (30-45) | 1 (1-7)  | 0 (0-0)  | 58 (57-80) | 266 (97-1340)  | 708 (187-3862) | 140 (44-3228)       |
| <b>DP15</b>                      | 1 (1-7)  | 30 (30-44) | 1 (1-7)  | 0 (0-0)  | 56 (55-76) | 268 (97-1313)  | 731 (187-3626) | 139 (45-3940)       |
| <b>DP15SZ15</b>                  | 1 (1-6)  | 30 (30-44) | 1 (1-6)  | 0 (0-0)  | 56 (55-74) | 268 (97-1197)  | 736 (186-3569) | 133 (43-3474)       |
| <b>PZ5</b>                       | 1 (1-7)  | 31 (30-44) | 1 (1-7)  | 0 (0-0)  | 59 (57-80) | 279 (104-1250) | 750 (175-3702) | 139 (45-3463)       |
| <b>SZ15</b>                      | 1 (1-7)  | 30 (30-43) | 1 (1-7)  | 0 (0-0)  | 58 (57-76) | 267 (96-1214)  | 726 (177-3415) | 138 (43-2981)       |
| <b>CH</b>                        | 1 (1-7)  | 31 (30-44) | 1 (1-11) | 0 (0-0)  | 56 (55-84) | 277 (97-2231)  | 762 (177-6582) | 145 (45-4204)       |
| <b>PV1km14d</b>                  | 1 (1-7)  | 30 (30-43) | 1 (1-7)  | 0 (0-40) | 59 (57-79) | 278 (109-1364) | 765 (244-4051) | 129 (44-3560)       |
| <b>PV1km25IH</b>                 | 1 (1-11) | 30 (30-45) | 1 (1-11) | 0 (0-0)  | 59 (57-88) | 276 (201-5730) | 745 (201-5730) | 139 (45-4329)       |
| <b>PV1km25PC</b>                 | 1 (1-9)  | 30 (30-43) | 1 (1-9)  | 0 (0-0)  | 59 (57-82) | 277 (104-1633) | 771 (201-4653) | 150 (45-3458)       |
| <b>PV3km14d_bov</b>              | 1 (1-6)  | 30 (30-43) | 1 (1-6)  | 0 (0-13) | 59 (57-77) | 275 (103-1131) | 771 (203-3569) | 139 (43-2982)       |

|                     |         |            |         |          |            |                |                |                            |
|---------------------|---------|------------|---------|----------|------------|----------------|----------------|----------------------------|
| <b>PV3km14d_sui</b> | 1 (1-9) | 30 (30-44) | 1 (1-9) | 0 (0-14) | 59 (57-81) | 271 (104-1587) | 729 (177-4730) | 139 (43-3902)              |
| <b>PV3km14d_ovi</b> | 1 (1-6) | 30 (30-42) | 1 (1-6) | 0 (0-9)  | 58 (57-76) | 272 (104-1068) | 745 (206-3168) | 129 (44-2903)              |
| <b>SV3km14d</b>     | 1 (1-6) | 31 (30-43) | 1 (1-6) | 0 (0-16) | 59 (57-79) | 270 (96-1196)  | 743 (186-3422) | 131 (45-3188) / 0 (0-8584) |
| <b>SV3km25IH</b>    | 1 (1-7) | 30 (30-43) | 1 (1-7) | 0 (0-0)  | 59 (57-75) | 270 (97-1260)  | 726 (187-3534) | 120 (43-3095) / 0 (0-0)    |
| <b>SV3km14d_bov</b> | 1 (1-7) | 30 (30-44) | 1 (1-7) | 0 (0-8)  | 56 (55-76) | 268 (103-1419) | 710 (201-4440) | 139 (47-3058) / 0 (0-854)  |

**Table S4:** Economic outcomes of the simulation model. Values shown as Median (5th and 95th percentiles)

| Mitigation measures stratified by epidemic initiation scenarios | Surveillance        | Culling           | Disposal           | Cleaning_and<br>_<br>Disinfection | Vaccination    | Control_Center      | Compensation         | Post-Outbreakmanageme<br>nt | Production losses    | Total_Direct_Losses    | Total_Indirect_Losses      | Total_Economic_Losses      |
|-----------------------------------------------------------------|---------------------|-------------------|--------------------|-----------------------------------|----------------|---------------------|----------------------|-----------------------------|----------------------|------------------------|----------------------------|----------------------------|
| <b>North_Cattle (SZ 1)</b>                                      |                     |                   |                    |                                   |                |                     |                      |                             |                      |                        |                            |                            |
| <b>Basic</b>                                                    | 220119 (0-9691780)  | 2965 (0-2405785)  | 8360 (0-9330777)   | 567568 (0-95110199)               | 0 (0-0)        | 456101 (0-2068365)  | 112557 (0-123294489) | 910736 (0-28709313)         | 6744 (0-6859140)     | 2351934 (0-271939592)  | 2715124762 (0-9603551423)  | 2719106044 (0-9886169576)  |
| <b>DP15</b>                                                     | 215659 (0-8244013)  | 2791 (0-5933220)  | 9221 (0-18244374)  | 567568 (0-202025777)              | 0 (0-0)        | 456101 (0-2387105)  | 123421 (0-215148423) | 967652 (0-41791136)         | 7212 (0-47293939)    | 2553955 (0-541369246)  | 2696235409 (0-11287875244) | 2699418242 (0-11856439059) |
| <b>DP15SZ15</b>                                                 | 238329 (0-9119599)  | 5899 (0-6914614)  | 18516 (0-21205964) | 648649 (0-235463641)              | 0 (0-0)        | 456101 (0-1994646)  | 211295 (0-243927148) | 1026538 (0-29533423)        | 15579 (0-57569100)   | 2902974 (0-609269722)  | 2743351709 (0-12292718678) | 2746710308 (0-12875488625) |
| <b>PZ5</b>                                                      | 284049 (0-10532189) | 8378 (0-2840110)  | 30007 (0-11204092) | 770271 (0-106019667)              | 0 (0-0)        | 466708 (0-2642734)  | 367125 (0-145387234) | 1281683 (0-44706454)        | 26016 (0-8476415)    | 3146330 (0-338004464)  | 2739236143 (0-10962915551) | 2743096087 (0-11305216277) |
| <b>SZ15</b>                                                     | 255387 (0-9011694)  | 4043 (0-2254096)  | 13192 (0-9167246)  | 648649 (0-85627763)               | 0 (0-0)        | 456101 (0-1963356)  | 163474 (0-119441808) | 931962 (0-29253044)         | 15716 (0-7204884)    | 2689690 (0-260468551)  | 2754271884 (0-10093449303) | 2757108986 (0-10348941072) |
| <b>CH</b>                                                       | 248635 (0-8573558)  | 10346 (0-2959081) | 34404 (0-11460219) | 851352 (0-113760889)              | 0 (0-0)        | 434887 (0-1994116)  | 354440 (0-147549616) | 1419474 (0-31001430)        | 25570 (0-8386345)    | 3362920 (0-329282904)  | 2738019378 (0-9569719156)  | 2741304294 (0-9874696397)  |
| <b>PV1km14d</b>                                                 | 227650 (0-9332566)  | 4614 (0-2347163)  | 14876 (0-9112926)  | 648649 (0-93310199)               | 0 (0-15710845) | 456101 (0-2460824)  | 180628 (0-120510936) | 956384 (0-41591808)         | 11568 (0-6904059)    | 2663869 (0-294916058)  | 2722896724 (0-16654881062) | 2724960846 (0-16956633537) |
| <b>PV1km25IH</b>                                                | 252958 (0-10115628) | 6079 (0-2488463)  | 18891 (0-10062761) | 729730 (0-97566959)               | 0 (0-15672603) | 466708 (0-2302249)  | 232338 (0-130550342) | 1108393 (0-37805791)        | 17444 (0-7598483)    | 2972012 (0-308614451)  | 2733891068 (0-16607765608) | 2736283164 (0-16931813968) |
| <b>PV1km25PC_</b>                                               | 236492 (0-11544635) | 5652 (0-2999719)  | 15241 (0-11986551) | 648649 (0-111182509)              | 0 (0-0)        | 456101 (0-2206256)  | 194814 (0-158477684) | 1057612 (0-29381876)        | 16439 (0-8496767)    | 2711278 (0-339554491)  | 2717117090 (0-10887171444) | 2719199501 (0-11208776616) |
| <b>PV3km14d_bo<br/>v</b>                                        | 229991 (0-9131830)  | 4754 (0-2202377)  | 13676 (0-8399300)  | 567568 (0-82643976)               | 0 (0-7344904)  | 466708 (0-2980567)  | 172438 (0-109421003) | 1078299 (0-50333112)        | 15436 (0-7357632)    | 2699901 (0-310172282)  | 2724504592 (0-17252901538) | 2726608473 (0-17530694967) |
| <b>PV3km14d_sui</b>                                             | 241009 (0-10173680) | 5530 (0-2625477)  | 17255 (0-10431088) | 648649 (0-96095334)               | 0 (0-15517368) | 466708 (0-2238077)  | 213316 (0-136646620) | 1011316 (0-35961749)        | 17608 (0-6613335)    | 2726513 (0-272491165)  | 2708662616 (0-16314482707) | 2711063400 (0-16650855615) |
| <b>PV3km14d_ovi</b>                                             | 239736 (0-9121548)  | 5464 (0-2325117)  | 13388 (0-9266600)  | 648649 (0-86187221)               | 0 (0-2328654)  | 466708 (0-2397712)  | 176209 (0-120862968) | 1147836 (0-34302062)        | 17608 (0-6613335)    | 2726513 (0-272491165)  | 2739757614 (0-16331124404) | 2743174320 (0-16596437735) |
| <b>SV3km14d</b>                                                 | 238093 (0-10753039) | 4127 (0-2458194)  | 13524 (0-9697190)  | 648649 (0-93537227)               | 0 (0-15691989) | 456101 (0-12718854) | 162541 (0-128260161) | 1009591 (0-670183895)       | 11239 (0-5277799491) | 2745236 (0-6245144661) | 2721201944 (0-9458977658)  | 2723055614 (0-15288889683) |
| <b>SV3km25IH</b>                                                | 203570 (0-11005003) | 3330 (0-2512459)  | 10050 (0-10189366) | 587838 (0-95969662)               | 0 (0-15687553) | 456101 (0-12761282) | 119137 (0-130396138) | 988254 (0-658236463)        | 9434 (0-5358374044)  | 2595134 (0-6323702349) | 2695892745 (0-9802260157)  | 2798682158 (0-16210101486) |

|                              |                     |                   |                     |                       |                |                    |                       |                       |                     |                       |                            |                            |
|------------------------------|---------------------|-------------------|---------------------|-----------------------|----------------|--------------------|-----------------------|-----------------------|---------------------|-----------------------|----------------------------|----------------------------|
| <b>SV3km14d_bo v</b>         | 238862 (0-9191398)  | 5305 (0-2062102)  | 16040 (0-8383054)   | 648649 (0-82435192)   | 0 (0-2066980)  | 434887 (0-3427122) | 196486 (0-109425145)  | 1111142 (0-346761862) | 12114 (0-177388619) | 2762596 (0-745978985) | 2753663502 (0-9745403380)  | 2756966933 (0-10509551582) |
| <b>Central_Cattle (SZ 1)</b> |                     |                   |                     |                       |                |                    |                       |                       |                     |                       |                            |                            |
| <b>Basic</b>                 | 529777 (0-11566231) | 34298 (0-2930406) | 120042 (0-11549699) | 1702704 (0-111821022) | 0 (0-0)        | 540957 (0-2228531) | 1510182 (0-152913648) | 2566700 (0-30435197)  | 95034 (0-8817066)   | 6995634 (0-331866620) | 2925443086 (0-11198244687) | 2934312160 (0-11523052797) |
| <b>DP15</b>                  | 482820 (0-9952796)  | 26320 (0-7549403) | 86066 (0-23066453)  | 1297298 (0-259518384) | 0 (0-0)        | 514440 (0-2069426) | 1053429 (0-273388507) | 1995230 (0-30116006)  | 79155 (0-66430554)  | 5446304 (0-660107127) | 2882240588 (0-12376761146) | 2886125682 (0-13060762552) |
| <b>DP15SZ15</b>              | 574040 (0-10364138) | 35592 (0-7859343) | 121533 (0-24571997) | 1500001 (0-276506901) | 0 (0-0)        | 551564 (0-2123521) | 1464694 (0-289651126) | 2581784 (0-31094374)  | 93772 (0-72756684)  | 6962630 (0-719794704) | 3029560696 (0-13760837663) | 3034878911 (0-14485759752) |
| <b>PZ5</b>                   | 589002 (0-12264187) | 32954 (0-3276409) | 113153 (0-12957709) | 1439190 (0-131700091) | 0 (0-0)        | 540957 (0-2938139) | 1394315 (0-166260949) | 2171208 (0-47758133)  | 88290 (0-9982992)   | 6424527 (0-391603021) | 2928113227 (0-12663041381) | 2934718106 (0-13038201094) |
| <b>SZ15</b>                  | 703185 (0-11485465) | 46728 (0-3173570) | 162866 (0-12551836) | 2270272 (0-119215623) | 0 (0-0)        | 578082 (0-2216863) | 1990784 (0-163651718) | 3074445 (0-31060473)  | 128580 (0-9190191)  | 9471452 (0-352625806) | 3113027002 (0-11769330807) | 3121195276 (0-12113122869) |
| <b>CH</b>                    | 413764 (0-11036583) | 38597 (0-3963410) | 134724 (0-15633752) | 1702704 (0-158779164) | 0 (0-0)        | 509136 (0-2365361) | 1718828 (0-205418634) | 2759988 (0-33935162)  | 104400 (0-11368380) | 7418417 (0-444592115) | 2901547340 (0-11771018430) | 2905633552 (0-12178269960) |
| <b>PV1km14d</b>              | 586018 (0-12414490) | 37586 (0-3274393) | 132326 (0-13277592) | 1581082 (0-127538601) | 0 (0-15736266) | 556868 (0-2673494) | 1682218 (0-173020928) | 2789743 (0-43062042)  | 106210 (0-9390953)  | 7525300 (0-399863199) | 2944109038 (0-18477687241) | 2949321831 (0-18869790647) |
| <b>PV1km25IH</b>             | 586127 (0-12064708) | 40168 (0-3242253) | 134677 (0-12915395) | 1722974 (0-123896032) | 0 (0-15703638) | 540957 (0-2471431) | 1571034 (0-167643553) | 2409084 (0-39141015)  | 125645 (0-9536395)  | 7389314 (0-378232237) | 2940173580 (0-18077854252) | 2950484602 (0-18472337855) |
| <b>PV1km25PC</b>             | 453617 (0-12291677) | 24423 (0-3148320) | 92173 (0-12521829)  | 1378379 (0-122728465) | 0 (0-0)        | 519743 (0-2281035) | 1032999 (0-164584370) | 2066918 (0-30789782)  | 78072 (0-9214447)   | 5524768 (0-357941365) | 2878396150 (0-11674849450) | 2881726656 (0-12025515833) |
| <b>PV3km14d_bo v</b>         | 619249 (0-11626371) | 33129 (0-3123332) | 112912 (0-12503282) | 1702704 (0-119126432) | 0 (0-9201594)  | 562171 (0-3533722) | 1468524 (0-161656345) | 2580449 (0-56363704)  | 96081 (0-9167394)   | 7021429 (0-395148632) | 2965062786 (0-19745265879) | 2971981232 (0-20151035509) |
| <b>PV3km14d_sui</b>          | 491742 (0-12785346) | 27603 (0-3444134) | 102019 (0-14058494) | 1418920 (0-130443332) | 0 (0-15521125) | 519743 (0-2525527) | 1331372 (0-183143347) | 2093588 (0-40112244)  | 80565 (0-10025606)  | 6614986 (0-413856706) | 2883206731 (0-18394478754) | 2886882418 (0-18783813816) |
| <b>PV3km14d_ovi</b>          | 474554 (0-13029616) | 27966 (0-3484671) | 95179 (0-13865251)  | 1418920 (0-135938607) | 0 (0-3035571)  | 530350 (0-2969960) | 1102098 (0-179845891) | 2202881 (0-39504663)  | 85092 (0-9970738)   | 5807686 (0-397827802) | 2917338906 (0-19488076009) | 2923518776 (0-19902787149) |

|                            |                      |                     |                     |                       |                     |                     |                       |                       |                       |                        |                            |                            |
|----------------------------|----------------------|---------------------|---------------------|-----------------------|---------------------|---------------------|-----------------------|-----------------------|-----------------------|------------------------|----------------------------|----------------------------|
| <b>SV3km14d</b>            | 555239 (0-13725151)  | 36748 (0-3312001)   | 125872 (0-13550430) | 1682434 (0-124240627) | 0 (0-15754673)      | 562171 (0-12993575) | 1539408 (0-177134277) | 3223784 (0-697208408) | 150035 (0-5431289648) | 7588886 (0-6489274017) | 2972109718 (0-11789878891) | 2980358216 (0-18359904992) |
| <b>SV3km25IH</b>           | 562398 (0-14363999)  | 37041 (0-3517851)   | 136551 (0-14026994) | 1540542 (0-139074418) | 0 (0-15745284)      | 530350 (0-12940540) | 1564044 (0-181230589) | 1999254 (0-690774386) | 104775 (0-5435276759) | 6900042 (0-6481469044) | 2913417229 (0-12052728107) | 2939169758 (0-18587312310) |
| <b>SV3km14d_bo v</b>       | 464305 (0-12054783)  | 28608 (0-2893932)   | 95783 (0-11961989)  | 1216217 (0-120523055) | 0 (0-3066172)       | 482619 (0-4627834)  | 1145845 (0-156999200) | 1939230 (0-486914755) | 77957 (0-368908237)   | 5884032 (0-1168871548) | 2927011732 (0-11740757695) | 2933321680 (0-12857168013) |
| <b>South_Cattle (SZ 1)</b> |                      |                     |                     |                       |                     |                     |                       |                       |                       |                        |                            |                            |
| <b>Basic</b>               | 1093622 (0-16254965) | 93122 (0-4605419)   | 366543 (0-18812241) | 3831084 (0-175137282) | 0 (0-0)             | 689455 (0-2716983)  | 4786626 (0-247857389) | 5664102 (0-34519005)  | 282697 (0-13449334)   | 16596658 (0-511402358) | 3257661190 (0-14226823970) | 3273797248 (0-14735440898) |
| <b>DP15</b>                | 1072438 (0-13033681) | 104447 (0-10180450) | 382209 (0-31432520) | 3810813 (0-360004245) | 0 (0-0)             | 721276 (0-2450217)  | 4997828 (0-369718018) | 5946636 (0-34206780)  | 291433 (0-113022389)  | 17348878 (0-927674784) | 3302609407 (0-15838812409) | 3321345321 (0-16767811984) |
| <b>DP15SZ15</b>            | 1033678 (0-12895555) | 103914 (0-10353981) | 382652 (0-32616538) | 3810814 (0-372385335) | 0 (0-0)             | 705366 (0-2461354)  | 5035148 (0-390385046) | 5684930 (0-33976635)  | 280824 (0-117787061)  | 16995250 (0-969880060) | 3451635619 (0-16976775203) | 3461375682 (0-17939378273) |
| <b>PZ5</b>                 | 1241145 (0-14405672) | 125268 (0-4266770)  | 460920 (0-17228701) | 4662166 (0-163520384) | 0 (0-0)             | 784918 (0-3120049)  | 6026770 (0-223913042) | 7747248 (0-49955013)  | 340329 (0-13236214)   | 20833984 (0-491144995) | 3404798678 (0-14239468156) | 3428151812 (0-14725332722) |
| <b>SZ15</b>                | 1123115 (0-14970673) | 122729 (0-4240421)  | 444166 (0-17223635) | 4459462 (0-164558220) | 0 (0-0)             | 731883 (0-2599245)  | 5719354 (0-224122243) | 6831988 (0-33925849)  | 338905 (0-12098023)   | 19676331 (0-472501356) | 3489551694 (0-14071866298) | 3512194667 (0-14549994060) |
| <b>CH</b>                  | 972539 (0-14599767)  | 136484 (0-5247328)  | 517503 (0-20739090) | 5391896 (0-208745414) | 0 (0-0)             | 763704 (0-2704785)  | 6793914 (0-271429813) | 8921532 (0-37033539)  | 380378 (0-15517047)   | 23746968 (0-575097765) | 3403713822 (0-14154377034) | 3428694638 (0-14737132200) |
| <b>PV1km14d</b>            | 1080577 (0-16763713) | 105847 (0-4729932)  | 390024 (0-19064651) | 3790543 (0-181232555) | 227457 (0-15768308) | 726580 (0-3086637)  | 5036681 (0-248484867) | 5961998 (0-44718447)  | 278477 (0-12857789)   | 18266742 (0-545267943) | 8134980382 (0-21681754301) | 8155907816 (0-22220406482) |
| <b>PV1km25IH</b>           | 1227390 (0-14756936) | 128175 (0-4059913)  | 495449 (0-16400831) | 4621625 (0-155726456) | 0 (0-15744896)      | 763704 (0-2779564)  | 6212311 (0-214101707) | 6541567 (0-41376571)  | 369895 (0-11503546)   | 20491487 (0-476150499) | 3376430607 (0-19978898020) | 3396219102 (0-20449017768) |
| <b>PV1km25PC</b>           | 1164720 (0-17099514) | 124953 (0-4764999)  | 456635 (0-19120642) | 4621624 (0-181435261) | 0 (0-0)             | 763704 (0-2832069)  | 5733027 (0-249276737) | 7129416 (0-34500563)  | 348446 (0-13702655)   | 20988659 (0-523398917) | 3370417017 (0-14895007339) | 3395141792 (0-15405266902) |

|                              |                      |                    |                     |                       |                     |                     |                       |                        |                        |                         |                            |                            |
|------------------------------|----------------------|--------------------|---------------------|-----------------------|---------------------|---------------------|-----------------------|------------------------|------------------------|-------------------------|----------------------------|----------------------------|
| <b>PV3km14d_bo v</b>         | 1151802 (0-13450936) | 112596 (0-3678652) | 422147 (0-14724363) | 4216219 (0-139869014) | 111049 (0-9866177)  | 758401 (0-3648808)  | 5464064 (0-191535912) | 7085650 (0-57788501)   | 304520 (0-10359240)    | 19330264 (0-448568522)  | 8327332468 (0-21240857383) | 8356822928 (0-21687506501) |
| <b>PV3km14d_sui</b>          | 1104279 (0-14266509) | 95107 (0-3761904)  | 348610 (0-15638658) | 4094598 (0-143081855) | 181932 (0-15524016) | 710669 (0-2715392)  | 4355085 (0-201697829) | 5803002 (0-40213304)   | 257324 (0-10566809)    | 16984792 (0-450030490)  | 8147947938 (0-19707659965) | 8165909651 (0-20162722299) |
| <b>PV3km14d_ovi</b>          | 1269677 (0-14865943) | 132235 (0-4076176) | 525811 (0-16726182) | 5554058 (0-157366324) | 37381 (0-3301910)   | 816739 (0-3257940)  | 6958323 (0-220594061) | 8753226 (0-42262626)   | 366398 (0-11832124)    | 23638540 (0-479096934)  | 8310524254 (0-21114124077) | 8323788042 (0-21490760275) |
| <b>SV3km14d</b>              | 1161655 (0-16512626) | 125190 (0-4356746) | 476699 (0-17856858) | 5270274 (0-164185248) | 185303 (0-15759148) | 816739 (0-13057217) | 6122756 (0-231521638) | 17020104 (0-692543669) | 3267712 (0-5455383691) | 36977785 (0-6526346084) | 3421740732 (0-13643667935) | 3461633162 (0-20255449683) |
| <b>SV3km25IH</b>             | 1183624 (0-14977530) | 122152 (0-3766019) | 463709 (0-15185788) | 4439192 (0-150318346) | 0 (0-15787162)      | 747794 (0-13057217) | 5988426 (0-197624275) | 6874048 (0-722238343)  | 307642 (0-5486576795)  | 19670337 (0-6548208943) | 3344944635 (0-12741067995) | 3359603005 (0-19212854869) |
| <b>SV3km14d_bo v</b>         | 1168586 (0-14390226) | 122840 (0-3731032) | 481660 (0-15148540) | 5108112 (0-148560912) | 22777 (0-3790320)   | 742490 (0-5642924)  | 6157222 (0-199153046) | 12362166 (0-603725596) | 480757 (0-541198554)   | 27697712 (0-1536080798) | 3610866432 (0-13456721079) | 3638731108 (0-14987260574) |
| <b>Zealand_Cattle (SZ 1)</b> |                      |                    |                     |                       |                     |                     |                       |                        |                        |                         |                            |                            |
| <b>Basic</b>                 | 51465 (0-3666421)    | 437 (0-623562)     | 1408 (0-2339782)    | 283784 (0-26280423)   | 0 (0-0)             | 392459 (0-1549683)  | 18810 (0-29149078)    | 492378 (0-25308367)    | 1124 (0-1862449)       | 1200824 (0-91165094)    | 2468346465 (0-5213640386)  | 2469600727 (0-5315741964)  |
| <b>DP15</b>                  | 54041 (0-3096424)    | 414 (0-1315683)    | 1320 (0-4045825)    | 283784 (0-49420972)   | 0 (0-0)             | 392459 (0-1474903)  | 18495 (0-48666350)    | 492790 (0-24372067)    | 1061 (0-6609155)       | 1211766 (0-136470663)   | 2468306746 (0-5140332966)  | 2469403361 (0-5280778713)  |
| <b>DP15SZ15</b>              | 48976 (0-3559071)    | 368 (0-1474655)    | 1183 (0-4760723)    | 283784 (0-54993275)   | 0 (0-0)             | 392459 (0-1623401)  | 16383 (0-56954262)    | 464903 (0-26095274)    | 937 (0-6679613)        | 1169245 (0-155446948)   | 2485822605 (0-6461271005)  | 2486824085 (0-6609109138)  |
| <b>PZ5</b>                   | 49747 (0-4338120)    | 368 (0-682111)     | 1165 (0-2855438)    | 283784 (0-28621641)   | 0 (0-0)             | 392459 (0-1728941)  | 16826 (0-38931679)    | 470087 (0-29326367)    | 937 (0-1905541)        | 1181749 (0-113231797)   | 2467869843 (0-6011615815)  | 2469149824 (0-6127956652)  |
| <b>SZ15</b>                  | 50235 (0-3078418)    | 391 (0-552636)     | 1175 (0-2042382)    | 283784 (0-21841231)   | 0 (0-0)             | 392459 (0-1475964)  | 17262 (0-26425984)    | 477484 (0-24517988)    | 999 (0-1513410)        | 1155718 (0-81600044)    | 2486616975 (0-5798849179)  | 2487693344 (0-5881687932)  |
| <b>CH</b>                    | 49352 (0-3676670)    | 391 (0-845854)     | 1183 (0-3331200)    | 283784 (0-38955432)   | 0 (0-0)             | 371245 (0-1612794)  | 17262 (0-43712421)    | 479830 (0-28559957)    | 999 (0-2365477)        | 1156066 (0-121688951)   | 2468425902 (0-5925760435)  | 2469598585 (0-6047394874)  |
| <b>PV1km14d</b>              | 52089 (0-3102961)    | 391 (0-483221)     | 1232 (0-1806089)    | 283784 (0-20073662)   | 0 (0-2429946)       | 392459 (0-1401185)  | 17638 (0-23499209)    | 479725 (0-22884608)    | 999 (0-1301308)        | 1180760 (0-77429256)    | 2467830124 (0-10888640983) | 2468988082 (0-10961059784) |
| <b>PV1km25IH</b>             | 52716 (0-3699433)    | 379 (0-538123)     | 1155 (0-2260767)    | 283784 (0-23335151)   | 0 (0-8878747)       | 392459 (0-1701893)  | 17262 (0-30292030)    | 478668 (0-28311933)    | 952 (0-1579973)        | 1183236 (0-97914145)    | 2468147872 (0-11927990628) | 2469311326 (0-12010620469) |
| <b>PV1km25PC</b>             | 51433 (0-4187619)    | 395 (0-660891)     | 1232 (0-2635597)    | 283784 (0-26400019)   | 0 (0-0)             | 392459 (0-1580443)  | 17653 (0-34618917)    | 480237 (0-24893675)    | 1061 (0-1671840)       | 1174082 (0-97778034)    | 2467830124 (0-5485698873)  | 2468938560 (0-5573658804)  |
| <b>PV3km14d_bo v</b>         | 48095 (0-3630003)    | 375 (0-499318)     | 1144 (0-1847314)    | 283784 (0-20985826)   | 0 (0-1138351)       | 392459 (0-1665299)  | 16463 (0-24198377)    | 463039 (0-25401872)    | 937 (0-1433138)        | 1156854 (0-82091422)    | 2467591814 (0-11705813162) | 2468782756 (0-11789920009) |
| <b>PV3km14d_sui</b>          | 50110 (0-3328664)    | 414 (0-500398)     | 1278 (0-2028752)    | 283784 (0-22641907)   | 0 (0-2681886)       | 392459 (0-1474903)  | 18495 (0-26933725)    | 480179 (0-24287570)    | 1061 (0-1490739)       | 1182084 (0-84527195)    | 2467949280 (0-11232929605) | 2469225238 (0-11319781454) |

|                               |                            |                           |                           |                                |                            |                          |                                |                               |                              |                                 |                                       |                                      |
|-------------------------------|----------------------------|---------------------------|---------------------------|--------------------------------|----------------------------|--------------------------|--------------------------------|-------------------------------|------------------------------|---------------------------------|---------------------------------------|--------------------------------------|
| <b>PV3km14d_ovi</b>           | 48001 (0-3664912)          | 348 (0-565178)            | 1122 (0-2231142)          | 283784 (0-24735827)            | 0 (0-382536)               | 392459 (0-1559759)       | 16029 (0-29316462)             | 466218 (0-25079422)           | 906 (0-1645437)              | 1155310 (0-93082863)            | 2467710969 (0-11485148578)            | 2468870068 (0-11566988937)           |
| <b>SV3km14d</b>               | 49873 (0-2878786)          | 391 (0-475197)            | 1232 (0-1838156)          | 283784 (0-21046636)            | 0 (0-1625178)              | 392459 (0-1910851)       | 17262 (0-24221509)             | 484305 (0-96153891)           | 937 (0-75360380)             | 1180514 (0-221475850)           | 2467949280 (0-4928408143)             | 2469192171 (0-5144243749)            |
| <b>SV3km25IH</b>              | 48628 (0-3855335)          | 391 (0-628395)            | 1232 (0-2400321)          | 283784 (0-23695961)            | 0 (0-4941756)              | 392459 (0-4330308)       | 17262 (0-31699892)             | 475654 (0-231907055)          | 999 (0-558292747)            | 1169894 (0-844540571)           | 2467790406 (0-5071521751)             | 2468957319 (0-5919477224)            |
| <b>SV3km14d_bo v</b>          | 52443 (0-2788862)          | 406 (0-462532)            | 1232 (0-1793770)          | 283784 (0-20073663)            | 0 (0-206614)               | 371245 (0-1357696)       | 18495 (0-22693211)             | 481965 (0-55191075)           | 1061 (0-5855263)             | 1163142 (0-109807394)           | 2486060916 (0-5408353173)             | 2487286146 (0-5512569139)            |
| <b>Entire_DK_Dairy (SZ 2)</b> |                            |                           |                           |                                |                            |                          |                                |                               |                              |                                 |                                       |                                      |
| <b>Basic</b>                  | 5817562 (1404800-21035012) | 1197270 (143785-6335728)  | 4708046 (548617-25725087) | 45891924 (6484464-237423809)   | 0 (0-0)                    | 1686513 (848560-3193768) | 61937493 (7206708-337243850)   | 25178408 (8820206-38824419)   | 3421650 (377863-18634090)    | 150434554 (26129219-681718046)  | 6745024000 (3522130028-17692141248)   | 6894703737 (3556677571-18369038681)  |
| <b>DP15</b>                   | 5433228 (1278426-19005594) | 2840125 (225625-15155131) | 8818693 (746864-47308645) | 102486542 (8874329-538449604)  | 0 (0-0)                    | 1617568 (816209-3065953) | 105062054 (9793453-554734780)  | 24965854 (9737917-39692011)   | 14440647 (727408-222376076)  | 264752934 (34759041-1439449334) | 6912528140 (3616179782-22584818779)   | 7155401002 (3662103926-24032510615)  |
| <b>DP15SZ15</b>               | 5309869 (1365656-16993759) | 2925229 (248441-14394033) | 9066472 (816190-44513671) | 106277086 (10084466-504833371) | 0 (0-0)                    | 1633478 (827346-2875027) | 106324228 (10422822-516024831) | 25496610 (9815866-38693861)   | 15905185 (1000727-211366088) | 274691878 (36338487-1351190572) | 7916815360 (4004655927-21881505679)   | 8198298778 (4043602339-23232414110)  |
| <b>PZ5</b>                    | 5509184 (1337980-18679729) | 1103334 (147051-5585963)  | 4328024 (593993-22728362) | 43013543 (6482437-217733259)   | 0 (0-0)                    | 1888046 (848560-3648808) | 56929786 (7872301-296333024)   | 32471776 (9568149-54995439)   | 3108851 (411954-16658448)    | 147781599 (27048549-634314802)  | 6712245125 (3462533011-17929225887)   | 6855588324 (3496744329-18562631848)  |
| <b>SZ15</b>                   | 5521154 (1324868-18401408) | 1159969 (151347-5584056)  | 4597870 (564571-22658309) | 45243274 (5876355-214818390)   | 0 (0-0)                    | 1675906 (816739-2940260) | 60167986 (6800615-295874848)   | 26028091 (9169454-37437172)   | 3272013 (432313-16458635)    | 148160688 (24676771-620015515)  | 7485428618 (3752025338-16611131234)   | 7629444939 (3777486216-17183875557)  |
| <b>CH</b>                     | 5277287 (1189584-19519274) | 1557437 (221437-7378263)  | 6016355 (791944-29449544) | 63243287 (8616898-294438040)   | 0 (0-0)                    | 1665299 (900534-3267486) | 78891728 (10295264-383849558)  | 27034023 (12279409-42563665)  | 4499233 (592032-22444676)    | 186535362 (36440709-804921215)  | 7149864160 (3549432007-17528338132)   | 7334687279 (3584887059-18290837995)  |
| <b>PV1km14d</b>               | 5506325 (1422219-18860999) | 1154082 (182274-5549593)  | 4493660 (687345-22766932) | 44614895 (7451356-219217042)   | 10932287 (479052-15799684) | 2280505 (922809-3648808) | 58967018 (8738044-295778587)   | 41313440 (11128622-63664918)  | 3284906 (508165-16322391)    | 171775841 (31868977-656343547)  | 13994154615 (8819883486-24115332385)  | 14158537302 (8852186025-24760491119) |
| <b>PV1km25IH</b>              | 5815067 (1355537-19731664) | 1194134 (163048-5893262)  | 4742265 (614494-24385662) | 46155438 (7210140-228229211)   | 15590262 (0-15778434)      | 2248684 (890988-3648808) | 62691365 (7696617-318191927)   | 75861023 (10318076-298343889) | 3368306 (424089-17364078)    | 183814776 (28741488-700292795)  | 14188667961 (3595939447-24690227386)  | 14372194139 (3624078771-2536419487)  |
| <b>PV1km25PC</b>              | 5675578 (1391268-22197726) | 1152999 (175271-6535084)  | 4586275 (640538-26029858) | 44716248 (7287167-259054230)   | 0 (0-0)                    | 1675906 (880381-3332719) | 60317840 (8175500-339900907)   | 25149308 (9715718-37875922)   | 3173825 (490376-20078959)    | 146382053 (28427729-716507388)  | 6623910609 (3516645080-18770946189)   | 6766563762 (3552738250-19488415845)  |
| <b>PV3km14d_bo v</b>          | 5615429 (1377286-19052800) | 1144385 (147993-5557594)  | 4547226 (570217-)         | 43844624 (6565545-210867712)   | 1775876 (57667-7598685)    | 1909260 (848560-3648808) | 59745040 (7117993-283701581)   | 30194131 (9226388-54436655)   | 3159176 (395857-16085953)    | 152113237 (26994733-628994398)  | 11167227320 (3723134922-122346031286) | 11326379796 (3755989049-22858329744) |



|                             |                                   |                                 |                                      |                                     |                                   |                                  |                                     |                                    |                                       |                                         |                                            |                                            |
|-----------------------------|-----------------------------------|---------------------------------|--------------------------------------|-------------------------------------|-----------------------------------|----------------------------------|-------------------------------------|------------------------------------|---------------------------------------|-----------------------------------------|--------------------------------------------|--------------------------------------------|
|                             |                                   |                                 | 21924617<br>)                        |                                     |                                   |                                  |                                     |                                    |                                       |                                         |                                            |                                            |
| <b>PV3km14d_sui</b>         | 5735554<br>(1347818-<br>19013374) | 1225634<br>(155918-<br>5343859) | 4753403<br>(566551-<br>21866868<br>) | 45385167<br>(6727707-<br>209655552) | 10510372<br>(391126-<br>15530718) | 1781976<br>(880381-<br>3182100)  | 62217902<br>(7504818-<br>284314064) | 30196488 (9767370-<br>45729488)    | 3513401<br>(391976-<br>16602715)      | 166842524<br>(28929925-<br>620902522)   | 6703940842<br>(347498398-<br>16279464634)  | 6872730434<br>(3500310882-<br>16897942426) |
| <b>PV3km14d_ovi</b>         | 5586130<br>(1311744-<br>22269173) | 1117592<br>(156173-<br>6534766) | 4443583<br>(607845-<br>26205330<br>) | 43114894<br>(6687167-<br>250560982) | 489841 (7851-<br>2666495)         | 1755458<br>(859167-<br>3648808)  | 58667177<br>(7812111-<br>342111903) | 27076042 (10072870-<br>43178718)   | 3200563<br>(413309-<br>19167205)      | 144862150<br>(28498657-<br>713460514)   | 6759218562<br>(3513556740-<br>18171961225) | 6982758222<br>(3739991018-<br>18846154729) |
| <b>SV3km14d</b>             | 6065737<br>(1349052-<br>20062022) | 1166267<br>(200794-<br>5701427) | 4674514<br>(766977-<br>22800373<br>) | 44675706<br>(7416897-<br>214944065) | 6033893<br>(258522-<br>15813295)  | 4688294<br>(912202-<br>13227459) | 61365497<br>(9538542-<br>299267286) | 259693900 (25050561-<br>737956126) | 849563552<br>(5532770-<br>5531287267) | 1288074303<br>(53266768-<br>6696242750) | 6929376769<br>(3552396853-<br>18016326379) | 8314447292<br>(3606694465-<br>23768818540) |
| <b>SV3km25IH</b>            | 6199202<br>(1288010-<br>19665699) | 1145926<br>(155049-<br>5602457) | 4560521<br>(535056-<br>23215383<br>) | 43358138<br>(6281761-<br>213233254) | 10113982 (0-<br>15807198)         | 7424900<br>(848030-<br>13046610) | 59622006<br>(6543324-<br>303754248) | 424345824 (9652616-<br>743972391)  | 1741516218<br>(412651-<br>8547898487) | 2455584140<br>(25842375-<br>6609713347) | 6728932960<br>(3449398126-<br>17771048274) | 9669133116<br>(3481612316-<br>22988538106) |
| <b>SV3km14d_bo<br/>v</b>    | 5622254<br>(1369096-<br>20708007) | 1153851<br>(173571-<br>5972253) | 4613337<br>(658424-<br>24830022<br>) | 45506788<br>(7214194-<br>231890021) | 985035 (36005-<br>5284486)        | 1988812<br>(859167-<br>7503392)  | 60509114<br>(8172947-<br>321424584) | 175565134 (16189840-<br>806083658) | 47369944<br>(690562-<br>983100734)    | 349884580<br>(36361243-<br>2383031452)  | 7495036272<br>(3936727716-<br>17730290785) | 7864165774<br>(3962676274-<br>20457109120) |
| <b>North_Pig (SZ<br/>1)</b> |                                   |                                 |                                      |                                     |                                   |                                  |                                     |                                    |                                       |                                         |                                            |                                            |
| <b>Basic</b>                | 1277514 (0-<br>11443747)          | 152862<br>(0-<br>2999450)       | 534016<br>(0-<br>11853541<br>)       | 6040545 (0-<br>113381835)           | 0 (0-0)                           | 763704 (0-<br>2174435)           | 6532020 (0-<br>153292938)           | 6978144 (0-29682958)               | 524996 (0-<br>9501857)                | 23509859 (0-<br>333633110)              | 3472565206 (0-<br>10827532813)             | 3495979202 (0-<br>11196808385)             |
| <b>DP15</b>                 | 1336880 (0-<br>9758801)           | 291038<br>(0-<br>7294285)       | 942089<br>(0-<br>22206030<br>)       | 10763520 (0-<br>256309597)          | 0 (0-0)                           | 806132 (0-<br>2026998)           | 11043990 (0-<br>256103733)          | 7668538 (0-28711296)               | 1305567 (0-<br>67613502)              | 35360389 (0-<br>638406958)              | 3639070793 (0-<br>11887245122)             | 3676364446 (0-<br>12530861045)             |
| <b>DP15SZ15</b>             | 1282472 (0-<br>8768669)           | 292759<br>(0-<br>6841655)       | 882619<br>(0-<br>20484497<br>)       | 10459466 (0-<br>232607556)          | 0 (0-0)                           | 784918 (0-<br>1973432)           | 10119079 (0-<br>234600734)          | 7549744 (0-28490661)               | 1406180 (0-<br>60353728)              | 33487305 (0-<br>591002608)              | 3835309691 (0-<br>11922229648)             | 3870222178 (0-<br>12556432094)             |
| <b>PZ5</b>                  | 1336913 (0-<br>10573463)          | 157522<br>(0-<br>2730085)       | 571566<br>(0-<br>10908894<br>)       | 6121626 (0-<br>107914941)           | 0 (0-0)                           | 795525 (0-<br>2494766)           | 7179366 (0-<br>140872293)           | 7267067 (0-39971896)               | 551256 (0-<br>8636868)                | 24751312 (0-<br>322481240)              | 3496952730 (0-<br>10715361150)             | 3523833428 (0-<br>11035662494)             |
| <b>SZ15</b>                 | 1300540 (0-<br>11074162)          | 155326<br>(0-<br>3034222)       | 563465<br>(0-<br>11458975<br>)       | 6202707 (0-<br>118465620)           | 0 (0-0)                           | 790222 (0-<br>2111854)           | 7179527 (0-<br>147630068)           | 7437392 (0-29584521)               | 587005 (0-<br>10295655)               | 24252610 (0-<br>331961388)              | 3723178042 (0-<br>11413782569)             | 3749110592 (0-<br>11761380276)             |
| <b>CH</b>                   | 1201286 (0-<br>10255791)          | 206563<br>(0-<br>3653588)       | 748968<br>(0-<br>13882913<br>)       | 8189195 (0-<br>140989960)           | 0 (0-0)                           | 848560 (0-<br>2175496)           | 9124500 (0-<br>180633298)           | 10174358 (0-31621537)              | 784278 (0-<br>11811524)               | 31755375 (0-<br>387958780)              | 3594418248 (0-<br>10856271814)             | 3628627548 (0-<br>11273553131)             |

|                           |                      |                    |                      |                        |                     |                     |                        |                        |                        |                         |                            |                            |
|---------------------------|----------------------|--------------------|----------------------|------------------------|---------------------|---------------------|------------------------|------------------------|------------------------|-------------------------|----------------------------|----------------------------|
| <b>PV1km14d</b>           | 1320348 (0-11196128) | 150039 (0-2955548) | 524224 (0-11961614)  | 6445950 (0-112791972)  | 483434 (0-15710623) | 784918 (0-2620459)  | 6490596 (0-155599405)  | 7235033 (0-41066223)   | 524473 (0-9433689)     | 25400276 (0-355226993)  | 8558587224 (0-17979300822) | 8585561912 (0-18325037941) |
| <b>PV1km25IH</b>          | 1387206 (0-11060914) | 172638 (0-2948016) | 600853 (0-11180432)  | 6871626 (0-112033860)  | 0 (0-15694451)      | 837953 (0-2377559)  | 7546732 (0-142728286)  | 8138222 (0-37884927)   | 567399 (0-9268071)     | 26389488 (0-348404084)  | 3700058802 (0-17504039880) | 3723575169 (0-17840263223) |
| <b>PV1km25PC</b>          | 1334556 (0-12404085) | 159588 (0-3391357) | 569262 (0-13293333)  | 6040544 (0-123596030)  | 0 (0-0)             | 784918 (0-2302780)  | 7284934 (0-169447058)  | 7106630 (0-29259799)   | 570309 (0-10425872)    | 24323532 (0-365229280)  | 3506880564 (0-11622505403) | 3530526186 (0-12011465903) |
| <b>PV3km14d_bo v</b>      | 1395723 (0-10816703) | 178183 (0-2863728) | 629256 (0-10728846)  | 6709464 (0-107781154)  | 222869 (0-7959902)  | 848560 (0-3309384)  | 7833460 (0-135403338)  | 8300910 (0-51075742)   | 589215 (0-8606066)     | 27192728 (0-348947522)  | 8887098653 (0-19165399981) | 8915562608 (0-19531349021) |
| <b>PV3km14d_sui</b>       | 1313928 (0-10094866) | 159703 (0-2636960) | 579903 (0-10252793)  | 6364869 (0-99518985)   | 440868 (0-15518725) | 795525 (0-2216863)  | 7133470 (0-132078607)  | 7712669 (0-35407681)   | 567682 (0-8779107)     | 25637828 (0-311514607)  | 8632070044 (0-16500134890) | 8657072968 (0-16804359927) |
| <b>PV3km14d_ovi</b>       | 1289897 (0-12569276) | 153983 (0-3459109) | 588439 (0-13682324)  | 6121625 (0-129796706)  | 37427 (0-2767849)   | 795525 (0-2908970)  | 7390547 (0-176139921)  | 7374659 (0-36985727)   | 536621 (0-10822229)    | 24473546 (0-396194199)  | 8603973672 (0-19421293095) | 8631150428 (0-19826735909) |
| <b>SV3km14d</b>           | 1240462 (0-13724255) | 152750 (0-3379639) | 545548 (0-13460081)  | 6263518 (0-131282522)  | 250214 (0-15725744) | 859167 (0-12993575) | 6903191 (0-174933701)  | 19006714 (0-667051291) | 4435768 (0-5427011638) | 41421258 (0-6453104181) | 3503808354 (0-11637840226) | 3550739205 (0-18169992210) |
| <b>SV3km25IH</b>          | 1388266 (0-12646240) | 172753 (0-3086903) | 618974 (0-11983426)  | 6608112 (0-116862242)  | 0 (0-15734912)      | 837953 (0-12856745) | 7844900 (0-157937840)  | 8309367 (0-671258324)  | 815428 (0-5403728246)  | 26432757 (0-6396014330) | 3564278910 (0-10994412427) | 3606724294 (0-17473354294) |
| <b>SV3km14d_bo v</b>      | 1282776 (0-10990312) | 154350 (0-2833817) | 544753 (0-11211576)  | 6283788 (0-107318991)  | 38186 (0-2648323)   | 753097 (0-4096423)  | 7034946 (0-145701904)  | 12714570 (0-421434867) | 622824 (0-269846938)   | 29466486 (0-981150554)  | 3720896322 (0-11143322100) | 3746376950 (0-12220062129) |
| <b>Central_Pig (SZ 1)</b> |                      |                    |                      |                        |                     |                     |                        |                        |                        |                         |                            |                            |
| <b>Basic</b>              | 1512550 (0-13466816) | 211193 (0-3817186) | 778567 (0-14524704)  | 8168924 (0-138040636)  | 0 (0-0)             | 869774 (0-2377029)  | 9773346 (0-190561292)  | 9268021 (0-30188602)   | 709545 (0-10920823)    | 31397884 (0-400488234)  | 3653651306 (0-12396445120) | 3686345842 (0-12795867678) |
| <b>DP15</b>               | 1577167 (0-11189193) | 450956 (0-8669772) | 1439187 (0-26629795) | 15425685 (0-301715029) | 0 (0-0)             | 901595 (0-2217393)  | 17015480 (0-310723381) | 10361169 (0-30581011)  | 2124760 (0-83983477)   | 50389684 (0-783964280)  | 3837406475 (0-13683250119) | 3884286508 (0-14483585268) |
| <b>DP15SZ15</b>           | 1471012 (0-10309320) | 368476 (0-8317461) | 1175330 (0-25044544) | 13074330 (0-293365692) | 0 (0-0)             | 869774 (0-2143144)  | 14159076 (0-291412460) | 9617108 (0-30371809)   | 1758858 (0-87163766)   | 41602610 (0-745306571)  | 4021788908 (0-14197368178) | 4064723786 (0-14942674749) |



|                      |                      |                     |                      |                        |                     |                    |                        |                       |                       |                         |                            |                            |
|----------------------|----------------------|---------------------|----------------------|------------------------|---------------------|--------------------|------------------------|-----------------------|-----------------------|-------------------------|----------------------------|----------------------------|
| <b>Basic</b>         | 1502083 (0-18706370) | 204048 (0-5393934)  | 749302 (0-21547640)  | 7763518 (0-208573113)  | 0 (0-0)             | 869774 (0-2939200) | 9728693 (0-280684931)  | 9325334 (0-34336334)  | 654473 (0-16754654)   | 31440780 (0-587711756)  | 3630237363 (0-15904146297) | 3662080173 (0-16491102340) |
| <b>DP15</b>          | 1606468 (0-16786966) | 451671 (0-14012746) | 1459349 (0-43819824) | 16358118 (0-497059727) | 0 (0-0)             | 912202 (0-2832599) | 17779486 (0-518274593) | 10255628 (0-36579772) | 1978956 (0-199765717) | 5058469 (0-1331337600)  | 3865738408 (0-20498383325) | 3905457602 (0-21840392819) |
| <b>DP15SZ15</b>      | 1560987 (0-15945049) | 421026 (0-13832181) | 1346634 (0-43003000) | 14918927 (0-486900261) | 0 (0-0)             | 906899 (0-2758350) | 16098702 (0-503356448) | 10828203 (0-36638898) | 2023841 (0-203664283) | 48813340 (0-1314242041) | 4226315768 (0-20770593067) | 4286617552 (0-22054102506) |
| <b>PZ5</b>           | 1520961 (0-18313838) | 211198 (0-5689248)  | 789446 (0-22611412)  | 7824330 (0-213596090)  | 0 (0-0)             | 901595 (0-3575089) | 10217142 (0-292843229) | 9317014 (0-49745713)  | 659039 (0-17409474)   | 32450160 (0-629094444)  | 3716401960 (0-17167717991) | 3745541564 (0-17805945713) |
| <b>SZ15</b>          | 1624766 (0-17407327) | 214742 (0-5231246)  | 799264 (0-20566639)  | 8168924 (0-198257568)  | 0 (0-0)             | 875078 (0-2780095) | 10301451 (0-267342615) | 8973541 (0-33617068)  | 703222 (0-16063695)   | 32607342 (0-567882380)  | 4011021460 (0-15858909550) | 4043838659 (0-16464279212) |
| <b>CH</b>            | 1335082 (0-15725177) | 257429 (0-6018030)  | 932892 (0-23518094)  | 10520277 (0-228229211) | 0 (0-0)             | 912202 (0-2844267) | 11889922 (0-304887885) | 12245452 (0-35308237) | 819457 (0-18115174)   | 40166564 (0-631394088)  | 3766616993 (0-14942156825) | 3808032487 (0-15570348117) |
| <b>PV1km14d</b>      | 1635636 (0-18949498) | 221252 (0-5603601)  | 828546 (0-22444429)  | 8655412 (0-212708254)  | 850482 (0-15768165) | 912202 (0-3342796) | 10579706 (0-287582233) | 9887029 (0-44210334)  | 733436 (0-16934901)   | 35035133 (0-631744634)  | 9129159706 (0-23754618192) | 9166612186 (0-24386362825) |
| <b>PV1km25IH</b>     | 1601858 (0-18921151) | 218760 (0-5547595)  | 784448 (0-22109153)  | 8168924 (0-209138654)  | 154121 (0-15768867) | 917506 (0-3203844) | 10045599 (0-284016049) | 9662732 (0-41522556)  | 653264 (0-15884822)   | 32853386 (0-622451846)  | 8351106322 (0-23540437385) | 8381591144 (0-24126185260) |
| <b>PV1km25PC</b>     | 1532486 (0-19903327) | 194885 (0-5920280)  | 727572 (0-23828490)  | 7682438 (0-219750150)  | 0 (0-0)             | 859167 (0-3066484) | 9166240 (0-306779634)  | 8221757 (0-33436320)  | 652239 (0-17492643)   | 29645768 (0-637704368)  | 3674593628 (0-16667277833) | 3707151173 (0-17306396340) |
| <b>PV3km14d_bo v</b> | 1592826 (0-15599437) | 223029 (0-4360111)  | 826920 (0-17402532)  | 8250006 (0-164513627)  | 346270 (0-10083337) | 944023 (0-3648808) | 10701024 (0-227567913) | 10750051 (0-56608020) | 695871 (0-13841517)   | 34838029 (0-513971064)  | 9241545194 (0-22476881634) | 9275582472 (0-23009021642) |
| <b>PV3km14d_sui</b>  | 1600736 (0-18133677) | 217820 (0-5285544)  | 803488 (0-21121052)  | 7804060 (0-193834592)  | 645339 (0-15525000) | 880381 (0-3087698) | 10442653 (0-273661900) | 9829880 (0-42332533)  | 665961 (0-16068663)   | 33574274 (0-594393531)  | 9021096736 (0-22539990408) | 9058416601 (0-23113137660) |
| <b>PV3km14d_ovi</b>  | 1542602 (0-20150787) | 207379 (0-5913177)  | 758647 (0-23627830)  | 7763518 (0-219798798)  | 74418 (0-3618177)   | 890988 (0-3648808) | 9706775 (0-305699315)  | 9081494 (0-40288186)  | 643462 (0-16704729)   | 30939704 (0-642619680)  | 9057838146 (0-24772355243) | 9092554369 (0-25414974923) |

|                         |                      |                    |                     |                       |                     |                      |                        |                        |                        |                         |                            |                            |
|-------------------------|----------------------|--------------------|---------------------|-----------------------|---------------------|----------------------|------------------------|------------------------|------------------------|-------------------------|----------------------------|----------------------------|
| SV3km14d                | 1460008 (0-18458714) | 224373 (0-5216908) | 832229 (0-20723256) | 8391898 (0-187903506) | 374156 (0-15762898) | 954630 (0-13173894)  | 10573671 (0-269976559) | 25464492 (0-694519765) | 8446762 (0-5517393909) | 58323720 (0-6625454336) | 3766388508 (0-15250770577) | 3823565706 (0-21966131274) |
| SV3km25IH               | 1619262 (0-19878173) | 238264 (0-5588139) | 874258 (0-22338863) | 9324330 (0-215981903) | 410105 (0-15784482) | 1012968 (0-13120859) | 11095268 (0-290481341) | 25348430 (0-708755282) | 9705104 (0-5528618593) | 69180429 (0-6636707755) | 3740240603 (0-15694576006) | 3866248011 (0-22438568151) |
| SV3km14d_bo v           | 1486310 (0-17498499) | 203801 (0-4934985) | 788447 (0-19920838) | 7722978 (0-187485938) | 56258 (0-4341780)   | 843257 (0-6216763)   | 10130884 (0-260567850) | 17826638 (0-650787172) | 1667971 (0-705150972)  | 41011362 (0-1873195712) | 3955562695 (0-15663064870) | 4000223953 (0-17645942264) |
| Zealand_Pig (SZ 1)      |                      |                    |                     |                       |                     |                      |                        |                        |                        |                         |                            |                            |
| Basic                   | 95437 (0-2415421)    | 4680 (0-468686)    | 11507 (0-1564747)   | 364865 (0-17965551)   | 0 (0-0)             | 403066 (0-1135479)   | 99785 (0-18565157)     | 553624 (0-14965651)    | 25632 (0-1877653)      | 1551303 (0-58572256)    | 2565627767 (0-4293735739)  | 2567112402 (0-4344889443)  |
| DP15                    | 100692 (0-2501454)   | 5463 (0-1047382)   | 12916 (0-2932418)   | 445946 (0-36447986)   | 0 (0-0)             | 424280 (0-1157224)   | 111373 (0-33282080)    | 556348 (0-16305952)    | 27318 (0-5650563)      | 1613418 (0-97202399)    | 2635080742 (0-4541397269)  | 2636636109 (0-4649846242)  |
| DP15SZ15                | 105172 (0-2239206)   | 5895 (0-924183)    | 13459 (0-2571972)   | 445946 (0-33577718)   | 0 (0-0)             | 413673 (0-1114265)   | 115447 (0-29730725)    | 570044 (0-14908229)    | 27579 (0-5398294)      | 1645164 (0-88550411)    | 2647406091 (0-4912360738)  | 2649003122 (0-4983653812)  |
| PZ5                     | 101394 (0-2499663)   | 5693 (0-413288)    | 13000 (0-1421144)   | 445946 (0-15975011)   | 0 (0-0)             | 424280 (0-1124872)   | 114705 (0-17666207)    | 562012 (0-14645718)    | 30116 (0-1657034)      | 1620342 (0-54362701)    | 2640103744 (0-4356892764)  | 2641713074 (0-4404648366)  |
| SZ15                    | 93296 (0-2440510)    | 4692 (0-479109)    | 10842 (0-1539415)   | 364865 (0-17053389)   | 0 (0-0)             | 403066 (0-1156163)   | 101963 (0-18322707)    | 554768 (0-15218074)    | 24508 (0-2035488)      | 1543824 (0-56170878)    | 2627398504 (0-4900189350)  | 2628812723 (0-4945896902)  |
| CH                      | 104291 (0-2188196)   | 6737 (0-571342)    | 14877 (0-1986514)   | 445946 (0-23434474)   | 0 (0-0)             | 392459 (0-1241019)   | 125137 (0-24777970)    | 569439 (0-19815627)    | 33374 (0-2134027)      | 1662525 (0-75657242)    | 2630901942 (0-4551139155)  | 2632671798 (0-4624330036)  |
| PV1km14d                | 103532 (0-2650303)   | 5792 (0-482743)    | 13093 (0-1601932)   | 445946 (0-17521632)   | 0 (0-2183559)       | 424280 (0-1209728)   | 118382 (0-20302729)    | 565247 (0-16619459)    | 27702 (0-1853349)      | 1628712 (0-63923446)    | 2636473676 (0-4510323751)  | 2638241920 (0-4576115577)  |
| PV1km25IH               | 94634 (0-2281423)    | 5760 (0-420005)    | 13742 (0-1318411)   | 445946 (0-15010144)   | 0 (0-4756784)       | 403066 (0-1157224)   | 114676 (0-16482000)    | 541719 (0-15511200)    | 27349 (0-1801425)      | 1587768 (0-57489688)    | 2624781478 (0-4156526437)  | 2626875306 (0-4211739025)  |
| PV1km25PC               | 97834 (0-2345372)    | 5177 (0-447629)    | 12550 (0-1501856)   | 445946 (0-17361499)   | 0 (0-0)             | 403066 (0-1124342)   | 113879 (0-18154034)    | 548438 (0-14433422)    | 26100 (0-1986222)      | 1566834 (0-58041724)    | 2635165162 (0-4324929238)  | 2636774032 (0-4346808777)  |
| PV3km14d_bo v           | 94699 (0-2557116)    | 4845 (0-472573)    | 11225 (0-1610884)   | 445946 (0-18099336)   | 0 (0-709385)        | 403066 (0-1230412)   | 102610 (0-19402204)    | 551843 (0-16003307)    | 26399 (0-1891135)      | 1566580 (0-61323345)    | 2628749227 (0-4423894952)  | 2630090869 (0-4488764792)  |
| PV3km14d_sui            | 107025 (0-2402105)   | 6347 (0-461699)    | 14577 (0-1471167)   | 445946 (0-16919604)   | 0 (0-1602349)       | 424280 (0-1124872)   | 119812 (0-18642879)    | 566242 (0-14925818)    | 30627 (0-1886774)      | 1644172 (0-59411752)    | 2638921861 (0-4335850662)  | 2641240418 (0-4383414919)  |
| PV3km14d_ovi            | 90901 (0-2574513)    | 4443 (0-463718)    | 10000 (0-1564169)   | 364865 (0-18383120)   | 0 (0-206453)        | 403066 (0-1209728)   | 90029 (0-18329899)     | 535654 (0-16695748)    | 21230 (0-1726288)      | 1535267 (0-60532635)    | 2546491204 (0-4500549096)  | 2547851035 (0-4570925024)  |
| SV3km14d                | 95037 (0-2271891)    | 4395 (0-435773)    | 10615 (0-1483725)   | 364865 (0-17489201)   | 0 (0-876514)        | 403066 (0-1304661)   | 93227 (0-17811787)     | 540832 (0-49366969)    | 24289 (0-228174502)    | 1580954 (0-1183292977)  | 2513161714 (0-4334272163)  | 2564751920 (0-4467976314)  |
| SV3km25IH               | 89667 (0-2489171)    | 5075 (0-450076)    | 11550 (0-1515150)   | 364865 (0-15022307)   | 0 (0-2755114)       | 403066 (0-2631597)   | 108481 (0-18722550)    | 545494 (0-116384971)   | 25749 (0-191068258)    | 1571232 (0-358567952)   | 2514654346 (0-4281958393)  | 2566296408 (0-4564690378)  |
| SV3km14d_bo v           | 98805 (0-2337671)    | 5359 (0-456740)    | 13769 (0-1330372)   | 364865 (0-17158795)   | 0 (0-134863)        | 371245 (0-1103658)   | 119588 (0-16573872)    | 547738 (0-36742618)    | 27599 (0-4969959)      | 1539636 (0-81789626)    | 2590853350 (0-4909893612)  | 2592375722 (0-4997043301)  |
| Entire_DK_Weaner (SZ 2) |                      |                    |                     |                       |                     |                      |                        |                        |                        |                         |                            |                            |

|                          |                                  |                                     |                                     |                                    |                          |                                 |                                    |                                |                                  |                                       |                                              |                                              |
|--------------------------|----------------------------------|-------------------------------------|-------------------------------------|------------------------------------|--------------------------|---------------------------------|------------------------------------|--------------------------------|----------------------------------|---------------------------------------|----------------------------------------------|----------------------------------------------|
| <b>Basic</b>             | 2924018<br>(141359-<br>17902067) | 499594<br>(15560-<br>4991905)       | 1839940<br>(32171-<br>19695381<br>) | 19114878<br>(567568-<br>199544731) | 0 (0-0)                  | 1294054<br>(434887-<br>2875558) | 23750377 ( 262887-<br>255950981)   | 18346467 (712225-<br>33783467) | 1599401 (97157-<br>15818147)     | 69778654<br>(2138985-<br>552606446)   | 4687425316<br>(2680472865-<br>15423821668)   | 4759688324<br>(2683355086-<br>15938000917)   |
| <b>DP15</b>              | 2738889<br>(142279-<br>14920505) | 1224480<br>(15560-<br>11795394<br>) | 3571734<br>(32000-<br>36056943<br>) | 42060834<br>(567568-<br>403942108) | 0 (0-0)                  | 1246322<br>(413673-<br>2609322) | 42626130<br>(240517-<br>417381113) | 18402118 (617275-<br>34023461) | 6244442 ( 84939-<br>134355743)   | 119991180<br>(2197177-<br>1060948847) | 4828642312<br>(2678913744-<br>17328123381)   | 4946909600<br>(2681249157-<br>18367301853)   |
| <b>DP15SZ15</b>          | 2705517<br>(101462-<br>13509738) | 1194271<br>(12017-<br>11067194<br>) | 3530882<br>(25752-<br>34298777<br>) | 41797319<br>(441892-<br>382228578) | 0 (0-0)                  | 1251626<br>(403066-<br>2492645) | 40451718<br>(222429-<br>400243763) | 18047147 (526375-<br>33620382) | 6101889 (75774-<br>128887520)    | 115058294<br>(1802146-<br>1008730105) | 5394677242<br>(2652724564-<br>17315171632)   | 5502715726<br>(2655014971-<br>18324148018)   |
| <b>PZ5</b>               | 2981002<br>(142504-<br>17962303) | 520675<br>(15998-<br>5400176)       | 1934987<br>(34053-<br>21552381<br>) | 19966230<br>(567568-<br>211475821) | 0 (0-0)                  | 1378910<br>(444964-<br>3595773) | 24969842<br>(269654-<br>278264016) | 20694393 (682487-<br>51895284) | 1718142 (95300-<br>16689837)     | 73158070<br>(2382276-<br>608661286)   | 4768615824<br>(2698595507-<br>17143192567)   | 4842296406<br>(2701746254-<br>17770476911)   |
| <b>SZ15</b>              | 2901673<br>(139766-<br>17958543) | 530305<br>(15560-<br>5482114)       | 1935402<br>(32000-<br>22177448<br>) | 20412176<br>(567568-<br>212896767) | 0 (0-0)                  | 1315268<br>(434887-<br>2939200) | 24587561 ( 257234-<br>288377501)   | 18487525 (650351-<br>34799310) | 1699977 (94016-<br>17472414)     | 73004850<br>(2046221-<br>607522191)   | 5393410905<br>(2682700181-<br>16388735519)   | 5455281109<br>(2684554049-<br>16992940281)   |
| <b>CH</b>                | 2866524<br>(130761-<br>15673906) | 714402<br>(15560-<br>5558519)       | 2692980<br>(36000-<br>21990270<br>) | 28378398<br>(567568-<br>222144070) | 0 (0-0)                  | 1389517<br>(403066-<br>2800778) | 34027914<br>(271850-<br>285396233) | 22047156 (686262-<br>38337932) | 2221190 (88631-<br>17919815)     | 97246978<br>(2380006-<br>610207710)   | 5136042946<br>(2666843404-<br>14719586413)   | 5234998071<br>(2669148968-<br>15368992718)   |
| <b>PV1km14d</b>          | 2744673<br>(143638-<br>17856321) | 469190<br>(15560-<br>5259957)       | 1753465<br>(33584-<br>21166271<br>) | 18324337<br>(567568-<br>202607572) | 2908933 (0-<br>15769869) | 1378910<br>(434887-<br>3648808) | 22485016<br>(269654-<br>273131438) | 21049272 (653409-<br>59608965) | 1602743 (75714-<br>16388668)     | 72016431<br>(2216102-<br>615460537)   | 10961907677<br>(2684126520 -<br>23704693099) | 11024438136<br>(2686930762 -<br>24298207151) |
| <b>PV1km25IH</b>         | 3213194<br>(177302-<br>16360731) | 563218<br>(17843-<br>4854231)       | 2113026<br>(38160-<br>19881901<br>) | 21871637<br>(648649-<br>187214317) | 9108186 (0-<br>15755128) | 1633478<br>(445494-<br>3554936) | 27259468<br>(306632-<br>255960307) | 26374537 (741694-<br>57078938) | 1842323<br>(109152-<br>15359893) | 95339984<br>(2647124-<br>578879002)   | 11564899050<br>(2731531412 -<br>22945010420) | 11657546126<br>(2734752884 -<br>23513836990) |
| <b>PV1km25PC</b>         | 3258059<br>(125197-<br>20897445) | 566405<br>(15920-<br>6012596)       | 2065723<br>(35959-<br>23742388<br>) | 22398664<br>(567568-<br>233436643) | 0 (0-0)                  | 1336482<br>(434887-<br>3182100) | 26380817<br>(269654-<br>310156836) | 19081009 (487588-<br>36862938) | 1935269 (97157-<br>18550455)     | 78616844<br>(2141018-<br>662274002)   | 4916044604<br>(2694697704-<br>17586623488)   | 4993311958<br>(2697203161-<br>18236603568)   |
| <b>PV3km14d_bo<br/>v</b> | 3129076<br>(183190-<br>17317621) | 541638<br>(17253-<br>5013977)       | 1991763<br>(35936-<br>20291901<br>) | 20756771<br>(729730-<br>192742023) | 531695 (0-<br>7100308)   | 1389517<br>(456101-<br>3648808) | 25410010<br>(306825-<br>262821036) | 19587328 (809548-<br>49983241) | 1736362 (97215-<br>15504148)     | 75475732<br>(2676812-<br>578468378)   | 11080776944<br>(2726759954 -<br>23470628707) | 11156325996<br>(2729133883 -<br>24049097085) |
| <b>PV3km14d_sui</b>      | 2927807<br>(181146-<br>18120806) | 501320<br>(15910-<br>5099276)       | 1919046<br>(35000-<br>20572859<br>) | 19500014<br>(648649-<br>199135268) | 2689889 (0-<br>15525545) | 1325875<br>(444964-<br>3108912) | 24864519<br>(269277-<br>267292088) | 19418398 (798368-<br>42905591) | 1678164 (97157-<br>16513883)     | 75043496<br>(2580337-<br>591342263)   | 10998649086<br>(2706573608 -<br>22882550023) | 11075018844<br>(2708747822-<br>23505737931)  |
| <b>PV3km14d_ovi</b>      | 2717688<br>(156857-<br>18272857) | 465510<br>(15560-<br>5383614)       | 1708017<br>(32000-<br>21370277<br>) | 18020282<br>(567568-<br>203126493) | 116870 (0-<br>2349720)   | 1278144<br>(434887-<br>3383633) | 21909612<br>(269397-<br>277802339) | 17462252 (650179-<br>39427832) | 1532432 (82320-<br>16706634)     | 66226822<br>(2385393-<br>586997361)   | 10687427733<br>(2698351359-<br>23423081000)  | 10753300258<br>(2701253742-<br>24019373291)  |

|                         |                              |                           |                                 |                                |                      |                              |                                |                              |                                               |                                   |                                        |                                        |
|-------------------------|------------------------------|---------------------------|---------------------------------|--------------------------------|----------------------|------------------------------|--------------------------------|------------------------------|-----------------------------------------------|-----------------------------------|----------------------------------------|----------------------------------------|
| SV3km14d                | 2643132<br>(146747-18467534) | 513519<br>(15560-5192951) | 1834385<br>(36162-20289245<br>) | 19358122<br>(567568-192559590) | 1503908 (0-15770997) | 1776672<br>(434887-13100175) | 23144208<br>(276004-261307843) | 69044818 (714740-710569549)  | 66176356<br>(97157-5487195287)                | 199518492<br>(2343645-6603387516) | 4729433158<br>(2720102510-16615112978) | 4910029020<br>(2722655231-22940764889) |
| SV3km25IH               | 3025479<br>(171104-17995174) | 485644<br>(17952-5070849) | 1777731<br>(38474-20199434<br>) | 18263526<br>(648649-196700811) | 3934758 (0-15783370) | 3590470<br>(445494-12982968) | 22456313<br>(299684-259906681) | 152356869 (744219-720017074) | 37286850000000<br>(9.725865e+04-5.462318e+09) | 616682198<br>(2536527-6556660717) | 4656655242<br>(2718977002-16126743088) | 5296026300<br>(2721635434-22236791777) |
| SV3km14d_bo<br>v        | 2580514<br>(151933-14325167) | 447013<br>(15560-3882364) | 1620984<br>(33017-15701385<br>) | 17898660<br>(567568-150987265) | 194740 (0-3629561)   | 1209198<br>(413673-5465787)  | 20865972<br>(281285-205392897) | 46466355 (715134-578564722)  | 6846455 (97127-531002807)                     | 97480890<br>(2410607-1509669214)  | 5182235476<br>(2715408024-13889367440) | 5278248754<br>(2717937176-15496365027) |
| North_Ruminant (SZ 1)   |                              |                           |                                 |                                |                      |                              |                                |                              |                                               |                                   |                                        |                                        |
| Basic                   | 78481 (0-1111829)            | 233 (0-136959)            | 154 (0-483365)                  | 81081 (0-4583111)              | 0 (0-0)              | 392459 (0-710669)            | 2038 (0-6241463)               | 679940 (0-6566190)           | 500 (0-409680)                                | 1307026 (0-20186179)              | 2471444508 (0-3250262450)              | 2472771216 (0-3263254108)              |
| DP15                    | 79057 (0-1196951)            | 227 (0-108818)            | 144 (0-440315)                  | 81081 (0-4297300)              | 0 (0-0)              | 392459 (0-721276)            | 1863 (0-5192345)               | 679397 (0-5735116)           | 437 (0-456387)                                | 1307628 (0-3435318275)            | 2471325352 (0-3435318275)              | 2472615741 (0-3447374330)              |
| DP15SZ15                | 82115 (0-1266913)            | 227 (0-157567)            | 154 (0-568609)                  | 81081 (0-5803382)              | 0 (0-0)              | 392459 (0-774841)            | 2070 (0-7482341)               | 686800 (0-7259158)           | 500 (0-613901)                                | 1311979 (0-22162869)              | 2492296720 (0-3592597380)              | 2493484729 (0-3622484821)              |
| PZ5                     | 81222 (0-1252565)            | 247 (0-149673)            | 150 (0-577642)                  | 81081 (0-6000004)              | 0 (0-0)              | 392459 (0-827346)            | 1863 (0-7674758)               | 687675 (0-9307714)           | 500 (0-370805)                                | 1315164 (0-26397550)              | 2471365071 (0-3488928775)              | 2472740794 (0-3504678241)              |
| SZ15                    | 79913 (0-1160690)            | 231 (0-135287)            | 154 (0-487978)                  | 81081 (0-4864868)              | 0 (0-0)              | 392459 (0-753627)            | 2070 (0-5958206)               | 687024 (0-7184331)           | 500 (0-411023)                                | 1308752 (0-21819265)              | 2492098128 (0-3547264604)              | 2493383420 (0-3572024156)              |
| CH                      | 78165 (0-1228236)            | 248 (0-218198)            | 162 (0-753652)                  | 81081 (0-8110141)              | 0 (0-0)              | 371245 (0-849090)            | 2070 (0-9757320)               | 687579 (0-10746943)          | 500 (0-635570)                                | 1287919 (0-30294586)              | 2471523945 (0-3560585323)              | 2472813084 (0-3588607683)              |
| PV1km14d                | 79376 (0-1151405)            | 225 (0-132578)            | 144 (0-460826)                  | 81081 (0-5079733)              | 0 (0-344732)         | 392459 (0-764234)            | 1863 (0-6329040)               | 677107 (0-7703294)           | 437 (0-405326)                                | 1301362 (0-22997651)              | 2471126760 (0-3372979073)              | 2472430690 (0-3385916590)              |
| PV1km25IH               | 79847 (0-1224981)            | 243 (0-126302)            | 150 (0-477491)                  | 81081 (0-4866895)              | 0 (0-0)              | 392459 (0-754688)            | 2070 (0-6517216)               | 686790 (0-7316627)           | 500 (0-359436)                                | 1313811 (0-21739112)              | 2471404790 (0-3365212928)              | 2472751550 (0-3392027955)              |
| PV1km25PC               | 78739 (0-1088036)            | 242 (0-100600)            | 154 (0-374482)                  | 81081 (0-4506084)              | 0 (0-0)              | 392459 (0-721806)            | 2070 (0-4927451)               | 680039 (0-6745600)           | 500 (0-330373)                                | 1305869 (0-18323521)              | 2471206197 (0-3298624030)              | 2472514372 (0-3310994620)              |
| PV3km14d_bo<br>v        | 79827 (0-1387242)            | 231 (0-175419)            | 162 (0-598815)                  | 81081 (0-6024328)              | 0 (0-205763)         | 392459 (0-870304)            | 2049 (0-7825141)               | 683868 (0-9232831)           | 500 (0-462889)                                | 1309204 (0-26700284)              | 2471285634 (0-3490052295)              | 2472600014 (0-3525776286)              |
| PV3km14d_sui            | 80015 (0-1267262)            | 245 (0-124909)            | 162 (0-412438)                  | 81081 (0-4990544)              | 0 (0-335506)         | 392459 (0-764234)            | 2070 (0-5613565)               | 678711 (0-7009965)           | 500 (0-387388)                                | 1309888 (0-21329922)              | 2471285634 (0-3429439252)              | 2472609524 (0-3448358189)              |
| PV3km14d_ovi            | 78901 (0-1025015)            | 225 (0-99303)             | 144 (0-388349)                  | 81081 (0-3938516)              | 0 (0-13838)          | 392459 (0-700592)            | 1863 (0-5098482)               | 679368 (0-5465754)           | 437 (0-305547)                                | 1306159 (0-18092593)              | 2471206197 (0-3228326002)              | 2472541041 (0-3253727784)              |
| SV3km14d                | 79142 (0-950006)             | 244 (0-82011)             | 150 (0-314538)                  | 81081 (0-3571624)              | 0 (0-165175)         | 392459 (0-721276)            | 2001 (0-4176776)               | 682666 (0-11494015)          | 500 (0-2305446)                               | 1305694 (0-23100580)              | 2471166478 (0-3169163468)              | 2472503847 (0-3183371334)              |
| SV3km25IH               | 80102 (0-1206707)            | 252 (0-126321)            | 162 (0-483842)                  | 81081 (0-4670273)              | 0 ( )                | 392459 (0-774311)            | 2070 (0-6556135)               | 685878 (0-7179518)           | 500 (0-363641)                                | 1312939 (0-19819349)              | 2471444508 (0-3329902390)              | 2472787354 (0-3347628166)              |
| SV3km14d_bo<br>v        | 80611 (0-1218144)            | 231 (0-138605)            | 150 (0-489218)                  | 81081 (0-4802030)              | 0 (0-23717)          | 371245 (0-721276)            | 1863 (0-6048517)               | 682186 (0-10738130)          | 500 (0-932867)                                | 1284304 (0-26508311)              | 2491859817 (0-3559512230)              | 2493113478 (0-3588617060)              |
| Central_Ruminant (SZ 1) |                              |                           |                                 |                                |                      |                              |                                |                              |                                               |                                   |                                        |                                        |

|                       |                   |                 |                 |                    |              |                    |                   |                     |                 |                      |                           |                           |
|-----------------------|-------------------|-----------------|-----------------|--------------------|--------------|--------------------|-------------------|---------------------|-----------------|----------------------|---------------------------|---------------------------|
| Basic                 | 81988 (0-1414424) | 243 (0-138659)  | 152 (0-524781)  | 81081 (0-6004058)  | 0 (0-0)      | 392459 (0-828407)  | 1950 (0-6596355)  | 615388 (0-8436741)  | 500 (0-442421)  | 1222726 (0-23600887) | 2469220272 (0-3520334455) | 2470434396 (0-3552937321) |
| DP15                  | 81294 (0-1314194) | 223 (0-1212980) | 150 (0-725107)  | 81081 (0-8154734)  | 0 (0-0)      | 392459 (0-828937)  | 1863 (0-9351248)  | 616689 (0-8745567)  | 500 (0-892488)  | 1226066 (0-30788636) | 2469140835 (0-3595527964) | 2470398194 (0-3643428096) |
| DP15SZ15              | 80469 (0-1399887) | 225 (0-203057)  | 150 (0-742724)  | 81081 (0-8730410)  | 0 (0-0)      | 392459 (0-849621)  | 1863 (0-9677745)  | 614938 (0-9930498)  | 437 (0-782329)  | 1221396 (0-33566870) | 2488046841 (0-3964807200) | 2489248708 (0-3998549353) |
| PZ5                   | 82167 (0-1399180) | 229 (0-163330)  | 154 (0-633839)  | 81081 (0-6498653)  | 0 (0-0)      | 392459 (0-870835)  | 2038 (0-8287440)  | 616948 (0-9974524)  | 500 (0-447826)  | 1222860 (0-28696686) | 2469061398 (0-3585527787) | 2470287178 (0-3615919826) |
| SZ15                  | 82010 (0-1573046) | 250 (0-199805)  | 162 (0-722068)  | 81081 (0-7883113)  | 0 (0-0)      | 392459 (0-912202)  | 2070 (0-9373521)  | 622088 (0-10244507) | 500 (0-610902)  | 1230310 (0-32103760) | 2488444026 (0-4008961618) | 2489750505 (0-4050482510) |
| CH                    | 78797 (0-1233940) | 216 (0-215876)  | 150 (0-772354)  | 81081 (0-9293925)  | 0 (0-0)      | 371245 (0-912732)  | 1863 (0-10011133) | 616772 (0-12172636) | 437 (0-677743)  | 1197070 (0-34955077) | 2469061398 (0-3578649482) | 2470236232 (0-3617888971) |
| PV1km14d              | 80751 (0-1307968) | 216 (0-122149)  | 150 (0-428933)  | 81081 (0-4510138)  | 0 (0-401338) | 392459 (0-784918)  | 1863 (0-5606373)  | 612697 (0-7813029)  | 437 (0-415310)  | 1214560 (0-20856185) | 2468823087 (0-3421632794) | 2470032286 (0-3439796894) |
| PV1km25IH             | 81471 (0-1291881) | 223 (0-146121)  | 150 (0-566299)  | 81081 (0-5760815)  | 0 (0-0)      | 392459 (0-827876)  | 1863 (0-6770117)  | 616123 (0-8153202)  | 437 (0-442742)  | 1223164 (0-23220039) | 2469101116 (0-3479837203) | 2470319723 (0-3499932384) |
| PV1km25PC             | 80592 (0-1353511) | 225 (0-143048)  | 150 (0-548939)  | 81081 (0-5639193)  | 0 (0-0)      | 392459 (0-796055)  | 1863 (0-6505056)  | 616757 (0-7951946)  | 468 (0-443170)  | 1224268 (0-23236018) | 2469061398 (0-3478651853) | 2470280527 (0-3498165169) |
| PV3km14d_bo v         | 81180 (0-1155745) | 216 (0-121055)  | 144 (0-421179)  | 81081 (0-4301354)  | 0 (0-138713) | 392459 (0-743020)  | 1863 (0-5357201)  | 614350 (0-6741922)  | 437 (0-344157)  | 1220026 (0-19410937) | 2469021680 (0-3278017141) | 2470241812 (0-3297428078) |
| PV3km14d_sui          | 81624 (0-1320249) | 225 (0-155464)  | 154 (0-575687)  | 81081 (0-5647301)  | 0 (0-393821) | 392459 (0-797116)  | 1863 (0-7374548)  | 615474 (0-8439957)  | 500 (0-490644)  | 1217546 (0-26462682) | 2468902524 (0-3466886014) | 2470126515 (0-3493963246) |
| PV3km14d_ovi          | 81366 (0-1461162) | 225 (0-183576)  | 161 (0-685882)  | 81081 (0-6510814)  | 0 (0-67292)  | 392459 (0-870304)  | 2070 (0-9177441)  | 619807 (0-9768516)  | 500 (0-535126)  | 1231644 (0-28869925) | 2469021680 (0-3557707615) | 2470299443 (0-3578709031) |
| SV3km14d              | 81064 (0-1208902) | 240 (0-150975)  | 154 (0-521590)  | 81081 (0-5517571)  | 0 (0-244709) | 392459 (0-806132)  | 2070 (0-6312580)  | 618377 (0-18387796) | 500 (0-4613214) | 1225610 (0-36147945) | 2469061398 (0-3361563822) | 2470291595 (0-3391992137) |
| SV3km25IH             | 79958 (0-1252796) | 216 (0-130728)  | 146 (0-463218)  | 81081 (0-4429057)  | 0 (0-0)      | 392459 (0-743551)  | 1863 (0-6141009)  | 613632 (0-7070693)  | 437 (0-344824)  | 1221805 (0-21244700) | 2468902524 (0-3336131186) | 2470175328 (0-3365622625) |
| SV3km14d_bo v         | 78889 (0-1098984) | 216 (0-137411)  | 144 (0-426132)  | 81081 (0-4504057)  | 0 (0-37367)  | 371245 (0-689985)  | 1863 (0-4951752)  | 613869 (0-11362791) | 437 (0-1049450) | 1190392 (0-23009439) | 2488046841 (0-3482438870) | 2489231508 (0-3500761198) |
| South_Ruminant (SZ 1) |                   |                 |                 |                    |              |                    |                   |                     |                 |                      |                           |                           |
| Basic                 | 92620 (0-1458735) | 350 (0-172345)  | 234 (0-648141)  | 81081 (0-5841896)  | 0 (0-0)      | 392459 (0-827346)  | 4689 (0-8208611)  | 731268 (0-7991678)  | 687 (0-574105)  | 1391152 (0-25657513) | 2472556626 (0-3489257376) | 2473997748 (0-3515668614) |
| DP15                  | 93291 (0-1567549) | 350 (0-310005)  | 250 (0-1068196) | 81081 (0-12774332) | 0 (0-0)      | 392459 (0-892049)  | 4729 (0-13665166) | 743838 (0-10575895) | 687 (0-1228397) | 1390628 (0-43280974) | 2472636063 (0-3800366136) | 2474041290 (0-3843561615) |
| DP15SZ15              | 94427 (0-1542822) | 325 (0-290001)  | 234 (0-1055614) | 81081 (0-11977709) | 0 (0-0)      | 392459 (0-880911)  | 4872 (0-13398217) | 741317 (0-10086636) | 687 (0-1252177) | 1389146 (0-41235421) | 2496665756 (0-4142405056) | 2497999380 (0-4174048328) |
| PZ5                   | 90429 (0-1487987) | 324 (0-181062)  | 217 (0-731113)  | 81081 (0-6851356)  | 0 (0-0)      | 392459 (0-850681)  | 4342 (0-9653890)  | 744758 (0-9936915)  | 624 (0-543880)  | 1383376 (0-28057102) | 2472477189 (0-3582383740) | 2473878112 (0-3608413263) |
| SZ15                  | 96016 (0-1917323) | 381 (0-297818)  | 279 (0-1060989) | 81081 (0-10631764) | 0 (0-0)      | 392459 (0-1028879) | 5722 (0-13408633) | 745673 (0-13142091) | 780 (0-850993)  | 1395642 (0-43478034) | 2496824630 (0-4347180513) | 2498269765 (0-4393579914) |
| CH                    | 92932 (0-1495469) | 360 (0-299719)  | 253 (0-1118914) | 81081 (0-10548655) | 0 (0-0)      | 371245 (0-1018272) | 5230 (0-14476207) | 744877 (0-14089412) | 749 (0-831346)  | 1365122 (0-42621133) | 2472794937 (0-3887240290) | 2474119872 (0-3944161311) |
| PV1km14d              | 95496 (0-1560442) | 360 (0-226983)  | 250 (0-900125)  | 81081 (0-7303383)  | 0 (0-678190) | 392459 (0-913263)  | 5020 (0-11167377) | 741284 (0-10824752) | 749 (0-653806)  | 1395760 (0-34456566) | 2472715500 (0-3635951070) | 2474120304 (0-3668106801) |



|                         |                   |                |                |                   |               |                    |                   |                     |                  |                      |                           |                           |
|-------------------------|-------------------|----------------|----------------|-------------------|---------------|--------------------|-------------------|---------------------|------------------|----------------------|---------------------------|---------------------------|
| PV1km25IH               | 94614 (0-1847319) | 394 (0-235913) | 288 (0-861066) | 81081 (0-9127709) | 0 (0-1168135) | 392459 (0-1019333) | 5722 (0-11993437) | 741972 (0-12414257) | 812 (0-643294)   | 1399480 (0-38668866) | 2472794937 (0-3920473472) | 2474204660 (0-3967274606) |
| PV1km25PC               | 94641 (0-1624709) | 359 (0-250650) | 270 (0-962124) | 81081 (0-8444600) | 0 (0-0)       | 392459 (0-965767)  | 5549 (0-12098428) | 744483 (0-11570038) | 749 (0-686128)   | 1386110 (0-37328173) | 2472715500 (0-3722623794) | 2474074180 (0-3761245383) |
| PV3km14d_bo v           | 93483 (0-1664166) | 324 (0-213903) | 234 (0-838593) | 81081 (0-7952032) | 0 (0-339479)  | 392459 (0-965767)  | 4505 (0-11066287) | 740131 (0-11318712) | 687 (0-628990)   | 1381406 (0-34864004) | 2472556626 (0-3710200239) | 2473940324 (0-3744594391) |
| PV3km14d_sui            | 92642 (0-1574525) | 324 (0-225158) | 225 (0-824822) | 81081 (0-8355411) | 0 (0-520533)  | 392459 (0-933946)  | 4347 (0-10944368) | 739545 (0-10977615) | 624 (0-575607)   | 1377100 (0-34623557) | 2472556626 (0-3707120757) | 2474016530 (0-3739231215) |
| PV3km14d_ovi            | 94126 (0-1641050) | 324 (0-215947) | 234 (0-820024) | 81081 (0-9170276) | 0 (0-103484)  | 392459 (0-965237)  | 4342 (0-10786188) | 741907 (0-11903762) | 687 (0-706293)   | 1381602 (0-34342504) | 2472556626 (0-3727823702) | 2474005628 (0-3777798706) |
| SV3km14d                | 90564 (0-1540267) | 324 (0-265373) | 234 (0-916147) | 81081 (0-9206763) | 0 (0-456434)  | 392459 (0-1028879) | 4816 (0-12362277) | 736894 (0-33894811) | 687 (0-11185619) | 1378604 (0-68892233) | 2472556626 (0-3739284771) | 2473934554 (0-3790567834) |
| SV3km25IH               | 93811 (0-1542124) | 324 (0-204724) | 230 (0-835754) | 81081 (0-7751356) | 0 (0-0)       | 392459 (0-901595)  | 4474 (0-11077136) | 742074 (0-11215749) | 687 (0-842253)   | 1383797 (0-34979958) | 2472556626 (0-3583948218) | 2474009668 (0-3668274238) |
| SV3km14d_bo v           | 94807 (0-1551794) | 377 (0-218685) | 279 (0-822111) | 81081 (0-7866897) | 0 (0-66406)   | 371245 (0-880381)  | 6245 (0-10718913) | 751176 (0-21540271) | 812 (0-2032983)  | 1386610 (0-45231869) | 2497102659 (0-4008982334) | 2498444543 (0-4060845114) |
| Zealand_Ruminant (SZ 1) |                   |                |                |                   |               |                    |                   |                     |                  |                      |                           |                           |
| Basic                   | 46548 (0-201286)  | 216 (0-9088)   | 126 (0-24170)  | 81081 (0-648649)  | 0 (0-0)       | 392459 (0-456101)  | 1449 (0-239674)   | 482744 (0-812062)   | 375 (0-22152)    | 1042586 (0-2292719)  | 2467075473 (0-2733630332) | 2468143187 (0-2735919895) |
| DP15                    | 45859 (0-160853)  | 216 (0-10769)  | 126 (0-10769)  | 81081 (0-608108)  | 0 (0-0)       | 392459 (0-456101)  | 1449 (0-163752)   | 483646 (0-834296)   | 375 (0-13531)    | 1040516 (0-2132682)  | 2467075473 (0-2704367129) | 2468118540 (0-2705789792) |
| DP15SZ15                | 45215 (0-185284)  | 216 (0-8575)   | 126 (0-20519)  | 81081 (0-652703)  | 0 (0-0)       | 392459 (0-456101)  | 1449 (0-241293)   | 488927 (0-998752)   | 375 (0-26103)    | 1045706 (0-2305608)  | 2484789924 (0-2762020071) | 2485895437 (0-2765045167) |
| PZ5                     | 46071 (0-174883)  | 216 (0-7567)   | 126 (0-13843)  | 81081 (0-527027)  | 0 (0-0)       | 392459 (0-445494)  | 1449 (0-145246)   | 484857 (0-896116)   | 375 (0-16750)    | 1041813 (0-2177681)  | 2466996036 (0-2709749224) | 2467997388 (0-2713448772) |
| SZ15                    | 45117 (0-175599)  | 216 (0-9712)   | 126 (0-20343)  | 81081 (0-648649)  | 0 (0-0)       | 392459 (0-445494)  | 1449 (0-238147)   | 483829 (0-783143)   | 375 (0-26221)    | 1036376 (0-2147437)  | 2484233865 (0-2726412307) | 2485286879 (0-2728260475) |
| CH                      | 46068 (0-147350)  | 216 (0-7206)   | 126 (0-16824)  | 81081 (0-648649)  | 0 (0-0)       | 371245 (0-413673)  | 1449 (0-178832)   | 486695 (0-899588)   | 375 (0-16418)    | 1021039 (0-2038013)  | 2467075473 (0-2670963939) | 2468083330 (0-2672795633) |
| PV1km14d                | 46133 (0-162532)  | 216 (0-7889)   | 126 (0-22705)  | 81081 (0-648649)  | 0 (0-0)       | 392459 (0-456101)  | 1449 (0-232015)   | 484000 (0-877511)   | 375 (0-20455)    | 1038696 (0-2211233)  | 2467075473 (0-2733400015) | 2468098215 (0-2735515076) |
| PV1km25IH               | 46533 (0-162310)  | 216 (0-7637)   | 126 (0-17214)  | 81081 (0-527027)  | 0 (0-0)       | 392459 (0-456101)  | 1449 (0-175790)   | 479698 (0-877901)   | 375 (0-15910)    | 1040046 (0-2144181)  | 2466996036 (0-2716247972) | 2468013600 (0-2717527489) |
| PV1km25PC               | 45397 (0-177910)  | 216 (0-11462)  | 126 (0-25165)  | 81081 (0-648649)  | 0 (0-0)       | 392459 (0-456101)  | 1449 (0-246476)   | 482654 (0-824501)   | 375 (0-48262)    | 1040897 (0-2166850)  | 2467075473 (0-2720989010) | 2468122110 (0-2723723493) |
| PV3km14d_bo v           | 46694 (0-169904)  | 216 (0-7648)   | 126 (0-19364)  | 81081 (0-648649)  | 0 (0-0)       | 392459 (0-456101)  | 1449 (0-231838)   | 483064 (0-788544)   | 375 (0-20121)    | 1039578 (0-2318828)  | 2467075473 (0-2719941723) | 2468120686 (0-2722726986) |
| PV3km14d_sui            | 45177 (0-165722)  | 216 (0-9741)   | 125 (0-19368)  | 81081 (0-450000)  | 0 (0-0)       | 392459 (0-456101)  | 1449 (0-178989)   | 482086 (0-800388)   | 375 (0-27492)    | 1042564 (0-1887341)  | 2466996036 (0-2722905416) | 2468052654 (0-2724341337) |
| PV3km14d_ovi            | 46269 (0-182306)  | 216 (0-10929)  | 126 (0-24797)  | 81081 (0-648649)  | 0 (0-0)       | 392459 (0-466708)  | 1449 (0-323259)   | 485428 (0-825078)   | 375 (0-28926)    | 1045162 (0-2318086)  | 2467115192 (0-2746993778) | 2468204681 (0-2751039777) |
| SV3km14d                | 46522 (0-195106)  | 216 (0-11807)  | 126 (0-31227)  | 81081 (0-729730)  | 0 (0-0)       | 392459 (0-456101)  | 1449 (0-349687)   | 485571 (0-971076)   | 406 (0-35191)    | 1047756 (0-2686797)  | 2467154910 (0-2745189688) | 2468217014 (0-2747465438) |
| SV3km25IH               | 46604 (0-182879)  | 216 (0-9080)   | 126 (0-21988)  | 81081 (0-648649)  | 0 (0-0)       | 392459 (0-456101)  | 1449 (0-235772)   | 486069 (0-814285)   | 375 (0-22781)    | 1037558 (0-2237868)  | 2467075473 (0-2747080753) | 2468090821 (0-2749523153) |

|                           |                              |                           |                          |                            |              |                               |                          |                              |                         |                                  |                                           |                                            |
|---------------------------|------------------------------|---------------------------|--------------------------|----------------------------|--------------|-------------------------------|--------------------------|------------------------------|-------------------------|----------------------------------|-------------------------------------------|--------------------------------------------|
| SV3km14d_bo<br>v          | 45201 (0-<br>165410)         | 216 (0-<br>8499)          | 126 (0-<br>19211)        | 81081 (0-<br>527027)       | 0 (0-0)      | 371245 (0-<br>424810)         | 1449 (0-182297)          | 484164 (0-781315)            | 375 (0-27650)           | 1021838 (0-<br>1971836)          | 2484511894 (0-<br>2721566974)             | 2485525882 (0-<br>2723118419)              |
| Entire_DK_Ruminant (SZ 2) |                              |                           |                          |                            |              |                               |                          |                              |                         |                                  |                                           |                                            |
| Basic                     | 63088<br>(13637-<br>807645)  | 4784<br>(1548-<br>82814)  | 3310<br>(800-<br>186099) | 162162 (81081-<br>2312839) | 0 (0-0)      | 392459<br>(381852-<br>625813) | 41479 (9506-<br>230846)  | 682686 (258543-<br>3664931)  | 8866 (2747-<br>205109)  | 1459531<br>(819159-<br>9897155)  | 2474304240<br>(2459370084-<br>3138473306) | 2475718042<br>(2460230234-<br>3144927294)  |
| DP15                      | 60839<br>(11792-<br>839978)  | 4716<br>(1572-<br>96188)  | 3303<br>(838-<br>240838) | 162162 (81081-<br>2432434) | 0 (0-0)      | 371245<br>(360638-<br>584446) | 40683 (9618-<br>294983)  | 693995 (258932-<br>3456229)  | 8679 (2810-<br>255288)  | 1448001<br>(799322-<br>11110965) | 2473986492<br>(2459842734-<br>3136724837) | 2475479224<br>(2460630285-<br>3151807821)  |
| DP15SZ15                  | 61477<br>(11832-<br>732156)  | 4464<br>(1548-<br>82814)  | 3265<br>(781-<br>224033) | 162162 (81081-<br>2031082) | 0 (0-0)      | 371245<br>(360638-<br>562171) | 39475 (9294-<br>2726340) | 691660 (248254-<br>3124456)  | 8323 ( 2685-<br>216913) | 1445279<br>(808991-<br>9665559)  | 2498453088<br>(2468664213-<br>3181180339) | 2499739095<br>(2469467427-<br>3188390185)  |
| PZ5                       | 62041<br>(14866-<br>787932)  | 4716<br>(1548-<br>84262)  | 3240<br>(809-<br>207452) | 162162 (81081-<br>2316893) | 0 (0-0)      | 403066<br>(381852-<br>625813) | 39484 (9315-<br>2646702) | 727936 (263202-<br>3298964)  | 8679 (2806-<br>216254)  | 1491044<br>(849152-<br>11170193) | 2493555793<br>(2460085017-<br>3140683941) | 2494704039<br>(246090514-<br>3151784538)   |
| SZ15                      | 64685<br>(13190-<br>714063)  | 4628<br>(1548-<br>69448)  | 3437<br>(774-<br>178553) | 162162 (81081-<br>2191217) | 0 (0-0)      | 392459<br>(381852-<br>583385) | 42907 (8901-<br>2296009) | 691924 ( 237978-<br>3141563) | 8679 (2685-<br>189411)  | 1500274<br>(823793-<br>9262379)  | 2501392257<br>(2468477536-<br>3181533102) | 2502914117<br>(2469256972-<br>3184874729)  |
| CH                        | 57598<br>(10938-<br>727366)  | 4959<br>(1575-<br>101961) | 3310<br>(828-<br>281314) | 162162 (81081-<br>3652705) | 0 (0-0)      | 371245<br>(380638-<br>668241) | 41479 (9613-<br>3564408) | 718133 (245182-<br>5889204)  | 9085 (2810-<br>265195)  | 1490234<br>(772818-<br>1494306)  | 2501301342<br>(2459528958-<br>3166968232) | 2502828780<br>(2460300371-<br>3180666831 ) |
| PV1km14d                  | 63184<br>(13645-<br>845457)  | 4248<br>(1548-<br>83513)  | 3370<br>(810-<br>212836) | 162162 (81081-<br>2519596) | 0 (0-141406) | 403066<br>(381852-<br>615206) | 43020 (9506-<br>2779874) | 721671 (293152-<br>3604912)  | 8148 (2747-<br>222298)  | 1502799<br>(853437-<br>11122928) | 2474780862<br>(2460077073-<br>3129483045) | 2476194958<br>(2460887529-<br>3137564215)  |
| PV1km25IH                 | 64950<br>(13403-<br>1007264) | 4701<br>(1548-<br>120580) | 3500<br>(810-<br>361845) | 162162 (81081-<br>3445948) | 0 (0-0)      | 403066<br>(381852-<br>710669) | 44192 (9506-<br>4467486) | 718017 (244592-<br>5354382)  | 8679 (2806-<br>278757)  | 1522051<br>(822470-<br>16246717) | 2476925661<br>(2459846706-<br>3238271184) | 2478473906<br>(2460671292-<br>3254169383)  |
| PV1km25PC                 | 62394<br>(12747-<br>936959)  | 5004<br>(1575-<br>82647)  | 3600<br>(810-<br>234398) | 162162 (81081-<br>3164191) | 0 (0-0)      | 403066<br>(381852-<br>647027) | 43056 (9315-<br>3079941) | 724631 (247637-<br>4320364)  | 9335 (2810-<br>216011)  | 1507627<br>(830246-<br>12954394) | 2476528476<br>(2459528958-<br>3132691947) | 2477965482<br>(2460306544-<br>3144659668)  |
| PV3km14d_bo<br>v          | 65207<br>(13930-<br>658081)  | 4649<br>(1548-<br>81861)  | 3240<br>(781-<br>194719) | 162162 (81081-<br>2152704) | 0 (0-9933)   | 403066<br>(381852-<br>593992) | 39484 (9294-<br>2478477) | 710469 (260833-<br>3055724)  | 8648 (2685-<br>194256)  | 1505982<br>(818285-<br>9545489)  | 2476766787<br>(2459846706-<br>3085114211) | 2478204654<br>(2460678128-<br>3092837947)  |
| PV3km14d_sui              | 63675<br>(15881-<br>958385)  | 4611<br>(1548-<br>99289)  | 3552<br>(781-<br>249303) | 162162 (81081-<br>3000002) | 0 (0-183360) | 397762<br>(381852-<br>636950) | 44778 (9315-<br>3184985) | 697339 (246821-<br>4184345)  | 8679 (2685-<br>243665)  | 1495187<br>(827535-<br>12904571) | 2476766787<br>(2460077073-<br>3150308707) | 2478200946<br>(2460886306-<br>3163564430)  |
| PV3km14d_ovi              | 63427<br>(14768-<br>724635)  | 4464<br>(1548-<br>82008)  | 2916<br>(800-<br>176003) | 162162 (81081-<br>2029055) | 0 (0-1932)   | 392459<br>(381852-<br>583385) | 36225 (9294-<br>2202728) | 696913 (267057-<br>2760084)  | 8055 (2747-<br>185752)  | 1469168<br>(878833-<br>9608174)  | 2475257484<br>(2460720513-<br>3062069460) | 2476705764<br>(2461873663-<br>3070889196)  |
| SV3km14d                  | 67685<br>(13004-<br>703990)  | 4428<br>(1572-<br>82048)  | 3310<br>(816-<br>214882) | 162162 (81081-<br>2152704) | 0 (0-66920)  | 403066<br>(381852-<br>615206) | 41336 (9521-<br>2732441) | 699355 (242978-<br>6416574)  | 8385 (2810-<br>857320)  | 1518416<br>(827738-<br>15512327) | 2503157047<br>(2459767269-<br>307358469)  | 2504331448<br>(2460559163-<br>3087553853)  |
| SV3km25IH                 | 63404<br>(12699-<br>774538)  | 4000<br>(1548-<br>82008)  | 2880<br>(781-<br>205905) | 162162 (81081-<br>2233785) | 0 (0-0)      | 403066<br>(381852-<br>573838) | 35354 (9315-<br>2662036) | 693771 (244111-<br>3250068)  | 7524 (2685-<br>194715)  | 1496273<br>(821302-<br>10421606) | 2476528476<br>(2459846706-<br>3083677409) | 2477926156<br>(2460678142-<br>3092586477)  |
| SV3km14d_bo<br>v          | 62818<br>(12918-<br>821038)  | 4716<br>(1620-<br>81854)  | 3402<br>(846-<br>216019) | 162162 (81081-<br>2312839) | 0 (0-6895)   | 371245<br>(360638-<br>583915) | 41845 (9936-<br>272861)  | 690475 (247764-<br>4636693)  | 9179 (2931-<br>271739)  | 1441573<br>(806031-<br>11701296) | 2500995072<br>(2468664213-<br>3217715431) | 2502230644<br>(2469612655-<br>3226794023)  |

## References

- [3] Bradhurst, R.; Garner, G.; Hóvári, M.; de la Puente, M.; Mintiens, K.; Yadav, S.; Federici, T.; Kopacka, I.; Stockreiter, S.; Kuzmanova, I.; et al. Development of a transboundary model of livestock disease in Europe. *Transbound. Emerg. Dis.* **2021**, *69*, 1963–1982. <https://doi.org/10.1111/tbed.14201>.
- [8] Garner, G.; Vosloo, W.; Tapsuwan, S.; Bradhurst, R.; Seitzinger, A.H.; Breed, A.C.; Capon, T. Comparing surveillance approaches to support regaining free status after a foot-and-mouth disease outbreak. *Prev. Vet. Med.* **2021**, *194*, 105441. <https://doi.org/10.1016/j.prevetmed.2021.105441>.
- [53] Brito, B. P., Perez, A. M., Cosentino, B., Rodriguez, L. L., König, G. A. Factors associated with within-herd transmission of serotype A foot-and-mouth disease virus in cattle, during the 2001 outbreak in Argentina: A protective effect of vaccination. *Transbound. Emerg. Dis.* **2011**, *58*, 387–393. doi:10.1111/j.1865-1682.2011.01217.x
- [54] Carpenter, T.E., Thurmond, M.C., Bates, T.W. A simulation model of intra herd transmission of foot and mouth disease with reference to disease spread before and after clinical diagnosis. *J. Vet. Diagn. Investig.* **2004**, *16*, 11–16. doi:10.1177/104063870401600103
- [55] Goris, N. E., Eblé, P. L., de Jong, M. C. and De Clercq, K. Quantification of foot-and-mouth disease virus transmission rates using published data. *Altex*, **2009**, *26*, 52–54. pmid:19326033
- [56] European Union., 2003. Council Directive 2003/85/EC. Off J L 306. 2003. Available online at: <https://eur-lex.europa.eu/legal-content/EN/TXT/HTML/?uri=CELEX:32003L0085&from=EN> (Accessed on 01.08.2022).
- [57] Orsel, K., Dekker, A., Bouma, A., Stegeman, J.A., De Jong, M.C.M., 2005. Vaccination against foot and mouth disease reduces virus transmission in groups of calves. *Vaccine*, **2005**, *23*, 4887–4894. doi:10.1016/j.vaccine.2005.05.014
- [58] Orsel, K., De Jong, M.C.M., Bouma, A., Stegeman, J. A., Dekker, A. The effect of vaccination on foot and mouth disease virus transmission among dairy cows. *Vaccine*, **2007a**, *25*, 327–335. doi:10.1016/j.vaccine.2006.07.030
- [59] Orsel, K., De Jong, M.C.M., Bouma, A., Stegeman, J. A., Dekker, A. Foot and mouth disease virus transmission among vaccinated pigs after exposure to virus shedding pigs. *Vaccine*, **2007b**, *25*, 6381–6391. doi:10.1016/j.vaccine.2007.06.010
- [60] Orsel, K., Bouma, A., Dekker, A., Stegeman, J. A., De Jong, M.C.M. Foot and mouth disease virus transmission during the incubation period of the disease in piglets, lambs, calves, and dairy cows. *Preventive Veterinary Medicine*, **2009**, *88*, 158–163. doi:10.1016/j.prevetmed.2008.09.001
